# 1 Prevalence of untreated HIV and HIV incidence 2 among occupational groups in Rakai, Uganda: a 3 population-based longitudinal study, 1999-2016 4

5 Victor O. Popoola<sup>1</sup>, Joseph Kagaayi<sup>2,3</sup>, Joseph Ssekasanvu<sup>1,2</sup>, Robert Ssekubugu<sup>2</sup>, Grace Kigozi<sup>2</sup>,  
6 Anthony Ndyababo<sup>2</sup>, Fred Nalugoda<sup>2</sup>, Larry W. Chang<sup>1,2,4</sup>, Tom Lutalo<sup>2</sup>, Aaron A.R. Tobian<sup>1,5</sup>, Donna  
7 Kabatesi<sup>6</sup>, Stella Alamo<sup>6</sup>, Lisa A. Mills<sup>6</sup>, Godfrey Kigozi<sup>2</sup>, Maria J. Wawer<sup>1,2</sup>, John Santelli<sup>7</sup>, Ronald H.  
8 Gray<sup>1,2</sup>, Steven J Reynolds<sup>4,8</sup>, David Serwadda<sup>2,3</sup>, Justin Lessler<sup>9,10</sup>, M. K. Grabowski<sup>1,2,5</sup>

- 9
- 10 1. Department of Epidemiology, Johns Hopkins Bloomberg School of Public Health, Baltimore,  
11 Maryland
  - 12 2. -Rakai Health Sciences Program, Entebbe, Uganda
  - 13 3. Makerere University School of Public Health, Kampala, Uganda
  - 14 4. Division of Infectious Diseases, Department of Medicine, Johns Hopkins School of Medicine,  
15 Baltimore, Maryland, USA
  - 16 5. Department of Pathology, Johns Hopkins School of Medicine, Baltimore, MD, USA
  - 17 6. Division of Global HIV and TB, Centers for Disease Control and Prevention Uganda, Kampala  
18 Uganda
  - 19 7. Department of Population and Family Health and Pediatrics, Columbia University, New York,  
20 NY, USA
  - 21 8. Laboratory of Immunoregulation, Division of Intramural Research, National Institute for Allergy  
22 and Infectious Diseases, National Institutes of Health, Bethesda, Maryland, USA
  - 23 9. Department of Epidemiology, UNC Gillings School of Global Public Health, Chapel Hill, NC,  
24 USA
  - 25 10. Carolina Population Center, Chapel Hill, NC, USA
- 26

27

28 Correspondence to: M. Kate Grabowski; 446 Carnegie Building, Department of Pathology, Johns  
29 Hopkins University, Baltimore, MD, 21205; Tel: +1 4432875736; email: [mgrabow2@jhu.edu](mailto:mgrabow2@jhu.edu)  
30

31

32

33

34

35

36

## 37 **Abstract**

38 **Introduction:** Certain occupations have been associated with heightened risk of HIV acquisition and  
39 spread in sub-Saharan Africa, including bar work and transportation. However, data on changes in  
40 prevalence of untreated HIV infection and HIV incidence within occupations following rollout of  
41 antiretroviral therapy and voluntary medical male circumcision programs in 2004 are limited.

42 **Methods:** We evaluated 12 rounds of survey data collected between 1999-2016, from the Rakai  
43 Community Cohort Study, a population-based study of adolescents and adults 15-49 years in Uganda, to  
44 assess changes in the prevalence of untreated HIV infection and incidence by self-reported primary  
45 occupation. Adjusted prevalence risk ratios (adjPRR) for untreated HIV and incidence rate ratios for HIV  
46 incidence with 95% confidence intervals (CIs) were estimated using Poisson regression. Primary  
47 outcomes were stratified by gender and HIV incidence compared over three time periods (1999-2004;  
48 2005-2011; 2011-2016) representing, respectively, the period prior to scale up of combined HIV  
49 prevention and treatment, the scale up period, and full implementation.

50 **Results:** 33,866 individuals, including 19,113 (56%) women participated. Of these participants, 17,840  
51 women and 14,244 men who were HIV-negative at their first study visit contributed 57,912 and 49,403  
52 person-years of follow-up, respectively. Agriculture was the most common occupation at all study visits,  
53 though its prevalence declined from 39 to 29% among men and from 61 to 40% among women between  
54 1999 and 2016. Untreated HIV infection substantially declined between 1999 and 2016 across most  
55 occupational subgroups, including by 70% among men (12 to 4.2%; adjPRR=0.30; 95% CI:0.23-0.41) and  
56 by 78% among women working in agriculture (14.7 to 4.0%; adjPRR=0.22; 95% CI:0.18-0.27), along  
57 with increasing antiretroviral therapy coverage. Exceptions included men working in transportation and  
58 women working in tailoring/laundry services. HIV incidence declined in most occupations, but there were  
59 no reductions in incidence among female bar and restaurant workers or men working in transportation.

60 **Conclusion:** Untreated HIV infection and HIV incidence have declined in most occupational sub-groups  
61 in Rakai, Uganda. However, women working in bars and restaurants and men working in transportation

62 continue to have relatively high burden of untreated HIV and HIV incidence, and as such should be  
63 considered key priority populations for targeted HIV programming.

64

65 **ABSTRACT WORD COUNT=350 (word limit=350)**

66

## 67 1. INTRODUCTION

68 Mass scale-up of combination HIV treatment and prevention interventions (CHI) in sub-Saharan  
69 Africa has led to significant declines in HIV incidence [1-4]. However, rates of new HIV infection remain  
70 significantly above elimination thresholds in most countries [5, 6]. Demographic heterogeneities in  
71 population-level risk of HIV acquisition and onward transmission likely drive continued virus spread, but  
72 they remain poorly characterized. A detailed understanding of such heterogeneities may facilitate  
73 targeted control efforts leading to further declines in HIV incidence and, ultimately, disease elimination.

74 Decades-old data has established a person's occupation as a salient risk factor for HIV acquisition  
75 in Africa. Occupations historically associated with increased HIV risk have included mining, bar work,  
76 truck driving, sex work, fishing, trading, and construction [3, 4, 7-10]. For example, a study of HIV risk  
77 in Uganda, conducted in 1992, prior to availability of antiretroviral therapy (ART), found that bar and  
78 restaurant work, trading, and truck and taxi driving were associated with three times higher odds of HIV  
79 acquisition compared to agricultural work [4]. In southern Africa, truck driving, factory work, and mining  
80 have been strongly linked to higher HIV burden [10-12]. While historical studies have provided useful  
81 insights into HIV risk by occupation, there are very limited data assessing key HIV outcomes within  
82 occupational subgroups since the widespread roll-out of CHI interventions in sub-Saharan Africa. Given  
83 that an individual's occupation can be readily assessed in programmatic settings, understanding whether  
84 HIV burden currently varies across occupations may facilitate efficient targeting of interventions.

85 Here, we assess the extent to which occupation-specific prevalence of untreated HIV and HIV  
86 incidence have changed since the implementation of CHI programs, including ART and voluntary  
87 medical male circumcision (VMMC), using data from the Rakai Community Cohort Study (RCCS), a  
88 population-based study of HIV in south-central Uganda. We have previously measured trends in HIV  
89 prevalence and incidence in the RCCS and shown a 42% reduction in HIV incidence with ART rollout  
90 beginning in 2004 and VMMC scale-up beginning in 2007 [13]. However, it remains unclear whether or  
91 not untreated HIV prevalence and incidence declines have occurred uniformly across occupational

92 subgroups in this population. We hypothesized that while the burdens of untreated HIV and HIV  
93 incidence have declined within all occupations, heterogeneities in HIV outcomes by occupation persist.  
94

## 95 2. METHODS

### 96 2.1 Study population and procedures

97 The Rakai Community Cohort Study (RCCS) has been described in detail elsewhere [14]. In  
98 brief, the RCCS is conducted by the Rakai Health Sciences Program (RHSP) and is an open, population-  
99 based census and cohort study including consenting individuals aged 15-49 years across 40 communities.  
100 Individuals are followed at ~18-month intervals. The RCCS conducts a household census to enumerate all  
101 individuals who are resident in the household, collecting data on gender, age, socioeconomic status, and  
102 global positioning system (GPS) location. The census is followed by a survey of all present consenting  
103 residents aged 15-49 years. Participant interviews provide data regarding sociodemographic  
104 characteristics, sexual behaviors, ART use, and whether they have had VMMC. Two attempts are made to  
105 contact individuals who are censused and eligible but who do not participate in the surveys.

106 To determine HIV status, venous blood samples are obtained for HIV testing. Prior to October  
107 2011, HIV testing used enzyme immunoassays (EIAs) with confirmation via Western Blot. Subsequently,  
108 a field-validated parallel three-test rapid HIV testing algorithm was introduced with demonstrated high  
109 sensitivity (>99.5%) and specificity (>99.5%). All rapid test positives are confirmed by two EIAs, with  
110 Western Blot or PCR for discordant EIA results [15, 16].

111 In this study, we include data from 12 consecutive surveys conducted between April 6, 1999 and  
112 September 2, 2016 collected from 30 continuously surveyed RCCS communities. Participation rates  
113 among census eligible persons present in community at time of survey ranged from 74 to 98% (59-66%  
114 including those absent from community at time of survey) during this period [13]. The Rakai fishing  
115 communities were not included because data collection did not commence in that population until 2011.  
116 The 12 surveys are herein denoted as surveys 1 through 12: start and complete dates for each survey are  
117 included in Supplemental Table 1. This study was approved by the Research and Ethics Committee of the  
118 Uganda Virus Research Institute, the Ugandan Council of Science and Technology, and the Johns  
119 Hopkins School of Medicine Institutional Review Board.

## 120 **2.2 Measurement and classification of participant occupation**

121 Data were collected as self-reported primary and secondary occupations. Participants were asked  
122 “What kind of work do you do, or what kind of activities keep you busy during an average day, whether  
123 you get money for them or not?” In this study, we only analyzed primary occupation. There were 23  
124 occupational subgroups that participants could select from on the questionnaire, including “other.”  
125 Individuals who listed “other” were asked to provide occupational details as a free-text response. Free-  
126 text responses were reviewed and re-assigned into pre-existing categories or new categories were created  
127 as needed. There were 41 self-reported primary occupations (Supplemental Tables 1a and 1b) which were  
128 aggregated into 15 occupational subgroups (Supplemental Table 2). Of these larger subgroups, 8 among  
129 men (agriculture, trading, student, construction, civil service, casual labor, mechanic, transportation) and  
130 9 among women (agriculture, trading, student, bar/restaurant work, civil service, hairdressing, local crafts,  
131 tailoring/laundry, housekeeping) contained a median number of  $\geq 50$  observations per survey across all  
132 surveys (Supplemental Tables 3a and 3b).

133

## 134 **2.3 Primary and secondary outcomes**

135 Our primary study outcomes were (1) untreated HIV infection and (2) incident HIV infection. We  
136 defined prevalent untreated HIV infection as HIV infection in an individual who did not self-report ART  
137 use. We have previously shown that self-reported ART use has high specificity (99%) and moderate  
138 sensitivity (77%) in this population [17]. Incident HIV infection was defined as a first HIV seropositive  
139 test result in a person with a prior seronegative test result. The unit of analysis for HIV incidence was  
140 person-years of follow-up between surveys, among persons who were initially HIV-negative and who  
141 contributed two consecutive survey visits or two visits with no more than one missing intervening survey.  
142 Incident infections were assumed to have occurred at the mid-point of the visit interval. Secondary  
143 outcomes included HIV prevalence overall, irrespective of self-reported ART use, and prevalence of self-  
144 reported ART use among HIV-positive persons.

145

## 146 **2.4 Scale-up and measurement of Combination HIV Intervention coverage in Rakai**

147 During the analysis period, antiretroviral therapy (ART) roll-out in Uganda, including Rakai, was  
148 phased as follows: in 2004, ART was offered to persons with a CD4-T-cell count of  $<250$  cells/mm<sup>3</sup>; in  
149 2011, the CD4 T-cell criterion was raised to  $<350$ ; and in 2013, it was further increased to  $<500$  and ART  
150 was also offered to all HIV-positive individuals, regardless of CD4 T-cell count, if they were pregnant, in  
151 a serodiscordant relationship, or self-identified as a sex worker or fisherfolk. Prevalence of self-reported  
152 ART use had risen to 69% of HIV positive individuals by 2016. In addition to ART, the RHSP has  
153 provided free VMMC since 2007 to adolescents and men age 13 years or older [13]. Prevalence of  
154 VMMC increased from 15% in 1999 to 59% by 2016 [13]. Impacts of universal HIV test and treat and  
155 pre-exposure prophylaxis impact were not assessed in this study as implementation of these programs  
156 occurred after the analysis period in 2017 and 2018, respectively.

157 To assess changes in HIV incidence by occupation over calendar time, we divided the study  
158 period into pre-CHI (1999-2004), early-CHI scale up (2005-2011), and mature-CHI (2012-2016) periods.  
159 Period-specific baselines were established as the first survey during each period, while the study baseline  
160 for individual participants was defined as their first survey during the study period.

161

## 162 **2.5 Statistical analysis**

163 Demographic characteristics of participants at period-specific baselines were summarized using  
164 descriptive statistics, including median and interquartile range for continuous variables and frequencies  
165 and percentages for categorical variables. The prevalence of each occupation was estimated as the number  
166 of participants in that occupation, expressed as a proportion of all participants surveyed and stratified by  
167 sex. Self-reported ART use among HIV positive participants was assessed during the early and mature-  
168 CHI periods and at the final study visit. Overall and untreated HIV prevalence were assessed at each of  
169 the 12 study visits and HIV incidence was estimated during the 11 inter-survey intervals over the 17-year  
170 analysis period. Primary and secondary outcomes were only assessed among the fifteen occupational  
171 subgroups (men, n=8; women, n=9). To evaluate changes in prevalence of untreated HIV infection and



172 HIV incidence within occupational subgroups, we constructed log-binomial regression models to estimate  
173 prevalence risk ratios (PRR) and Poisson regression models to estimate incidence rate ratios (IRR). These  
174 IRRs and PRRs were adjusted for age and marital status. We calculated IRRs for HIV infection,  
175 comparing incidence rates during the pre-, early-, and late-CHI periods. All statistical analyses were  
176 performed in Stata version 15 and the R statistical software (Version 3.6).  
177

## 178 3. RESULTS

### 179 3.1 Characteristics of study participants

180 Overall, 33,866 individuals, including 19,113 (56%) women participated, contributing a total of  
181 102,759 person-visits. Of these participants, 17,840 women and 14,244 men who were HIV-negative at  
182 their first study visit contributed 57,912 and 49,403 person-years to the incidence cohort, respectively.  
183 Table 1 shows characteristics of the study population by sex at the first (baseline) study visit within the  
184 CHI periods. Among women, during the pre-CHI baseline visit, median age was 25.0 years (IQR: 20.0-  
185 34.0), 59% (2056/3474) were married, and the prevalence of untreated HIV was 16%. Median age at the  
186 late-CHI baseline visit for women was 28 years (IQR: 22.0-34.0), 60% (2265/3758) were married, and  
187 prevalence of untreated HIV infection was 9.1%. Among men, during the first pre-CHI baseline visit,  
188 median age was 26.0 years (IQR: 20.0-33.0), 56% (1418/2518) were married, 15% (374/2518) were  
189 circumcised, and the prevalence of untreated HIV infection was 8.1%. Median age at the late-CHI  
190 baseline visit for men was 27 years (IQR: 20.0-36.0), 52% (1524/2944) were married, 46% (1359/2944)  
191 were circumcised, and the prevalence of untreated HIV infection was 6.4%.

192

### 193 3.2 Population prevalence of occupations over calendar time

194 Figure 1 shows the proportion of participants in each occupational subgroup over calendar time  
195 stratified by sex. At the initial visit (1999-2000), the majority of women (61%) reported agriculture as  
196 their primary occupation. While agriculture remained the most commonly reported female occupation at  
197 the final visit (2015-16), its prevalence significantly declined to 40% (PRR 0.66, 95% CI: 0.62-0.69)  
198 (Figure 1, Supplemental Table 3a). Declines in agricultural work among women were accompanied by an  
199 increase in the average age within the occupation (Supplemental Figure 1) and were predominately offset  
200 by the proportion of women who reported working in trading (9.4% in 1999 vs. 16% in 2016, PRR 1.7,  
201 95% CI: 1.49-1.91) and being a student (7.3% vs. 14%, PRR 1.97, 95% CI: 1.72-2.27). Notably, no women

202 or men reported sex work as a primary occupation, and very few people reported being unemployed ( $n < 5$   
203 at all study visits; Supplemental Tables 1a-b).

204 Men similarly reported agriculture and trading as their most common primary occupations  
205 (Figure 1, Supplemental Table 3b). Between the first (1999-2000) and last (2015-2016) study visit, there  
206 was a decrease in the proportion of male participants reporting agriculture (39% vs. 29%, PRR 0.74,  
207 95%CI: 0.68-0.80), while a greater proportion reported being a student (13% vs. 22.0%, PRR 1.74,  
208 95%CI: 1.53-1.96), mechanic (2.5% vs. 5.6%, PRR 2.29, 95%CI: 1.74-3.01), or working in transportation  
209 (1.9% vs. 4.7%, PRR 2.42, 95%CI: 1.78-3.28).

210

### 211 **3.3 Trends in the prevalence of ART use and untreated HIV within occupations**

212 The proportion of male and female HIV-positive participants self-reporting ART use increased  
213 over time among all occupational subgroups (Tables 2a-b). During the late-CHI period and at the final  
214 study visit, levels of ART use was highest among women working in agriculture and lowest among  
215 female students. ART use was statistically significantly lower among female traders (adjPRR=0.91; 0.83-  
216 0.98) and bar/restaurant workers (adjPRR=0.87; 95%CI: 0.78-0.97) compared to women working in  
217 agriculture during the late CHI-period. Among men, ART use was highest among those working in civil  
218 service over the entire analysis period. During the late CHI period, ART use was statistically significantly  
219 lower among men working in trading (adjPRR=0.91; 95%CI: 0.83-0.98) and male students (adjPRR:  
220 0.59; 95%CI: 0.41-0.84).

221 Figures 2 and 3 show the prevalence of untreated HIV within occupational subgroups by gender  
222 at each of the 12 survey visits. Significant declines in the prevalence of untreated HIV were observed in  
223 nearly all occupational subgroups, irrespective of gender, with scale-up of ART use. Relative changes in  
224 untreated HIV between the initial and final visits are shown in Table 3 for each occupational subgroup by  
225 gender. The prevalence of untreated HIV significantly decreased within most occupations. For example,  
226 among women working in agriculture, prevalence of untreated HIV decreased from 15% to 4.0% (adjPRR

227 0.27; 95%CI:0.22-0.34) and among men, prevalence of untreated HIV decreased from 12% to 4%  
228 (adjPRR 0.27, 95%CI: 0.22-0.34).

229 Women working in bars and restaurants had among the highest HIV burdens across all  
230 occupational subgroups. The prevalence of untreated HIV significantly declined among female bar and  
231 restaurant workers from a high of 35% in 1999-2000 to 12% by 2015-2016 (adjPRR 0.38; 95%CI: 0.25-  
232 0.58). However, these women still maintained a three-fold higher burden of untreated HIV, compared to  
233 women working in agriculture, at the final visit (12% vs. 4.0%). Women working in local crafts and in  
234 trading also continued to have a high prevalence of untreated HIV compared to women in agriculture at  
235 the final visit.

236 Men working in transportation did not have significantly higher HIV prevalence than other male  
237 occupations at the initial visit (Table 3). However, we observed no declines in untreated HIV in this  
238 population over the analysis period, and by the final visit, they had the highest prevalence of untreated  
239 HIV among all male occupations at 7.1%.

240

### 241 **3.4 Changes in HIV incidence within occupations before and during scale-up of CHI programs**

242 Table 4 shows HIV incidence by occupation, gender, and calendar time. In the early CHI period,  
243 HIV incidence rates ranged among the major occupations from 0.4 to 2.3 per 100 person-years among  
244 women, and from 0.1 to 1.8 per 100 person-years among men. Between the early and late CHI periods,  
245 HIV incidence declined among most occupational subgroups. For example, among those working in  
246 agriculture, HIV incidence declined by 67% among men (adjIRR 0.33, 95%CI: 0.21- 0.54) and 38%  
247 among women (adjIRR 0.62; 95%CI: 0.45-0.86). HIV incidence trends in most other occupations showed  
248 a decline but were not statistically significant. While HIV incidence did not decline among students,  
249 incidence overall in this population was low. HIV incidence rates also did not decline among men  
250 working in transportation, and women working in bars and restaurants and local crafts.

251 Table 5 shows the adjusted relative risk of HIV acquisition by occupation during the late CHI  
252 period. Compared to women working in agriculture, female bar and restaurant workers had a three-fold

253 higher HIV incidence (adjIRR 2.88, 95% CI 1.51-5.49,  $p = 0.001$ ). Men working in transportation also  
254 had increased HIV incidence compared to agricultural workers (adjIRR 2.75, 95% CI 1.37-5.50).  
255 Regardless of sex, students had a significantly lower risk of HIV acquisition compared to persons  
256 working in agriculture (men: adjIRR 0.19, 95% CI 0.05-0.73; women: adjIRR 0.36, 95% CI 0.18-0.72).  
257

## 258 4. DISCUSSION

259 In this population-based study, we observed declining prevalence of untreated HIV and HIV  
260 incidence among most occupational subgroups with the scale up of CHI programs in Uganda. Among  
261 men and women working in agriculture, the most common primary occupation, prevalence of untreated  
262 HIV and HIV incidence declined by more than two-thirds. However, this was not always the case for  
263 other occupations. While women working in bars and restaurants made up a small proportion of the  
264 overall population, they had among the highest burdens of untreated HIV prior to CHI scale-up, with no  
265 declines in HIV incidence over the analysis period. We also found no significant reduction in HIV  
266 incidence among male transportation workers. Moreover, both female bar and restaurant workers and  
267 male transportation workers had the highest prevalence of untreated HIV at the final study visit. HIV  
268 incidence rates among women reporting student and crafting as primary occupations also showed no  
269 decrease following CHI scale-up, although students had a very low HIV burden overall. Taken together,  
270 these results suggest that members of traditionally high-risk occupations continue to experience elevated  
271 rates of HIV incidence and remain challenging to engage in HIV programs.

272 Other studies have reported high HIV prevalence among female bar workers in sub-Saharan  
273 Africa [18, 19]. In this study, HIV prevalence among female bar and restaurant workers exceeded 40%  
274 with rising prevalence in recent years. While the prevalence of untreated HIV significantly declined in  
275 this population, it was three times higher than among women working in agriculture at the final study  
276 visit. Female bar work also has been associated with a heightened risk of HIV incidence in prior studies  
277 [20, 21]. The high burden of HIV among these women has been linked to elevated rates of transactional  
278 sex, alcohol use, and mobility [21-23]. In a systematic review of socio-demographic characteristics and  
279 risk factors for HIV among female bar workers, high rural-to-urban mobility, transactional sex, and  
280 inconsistent condom use were common and associated with financial needs and social marginalization  
281 [21]. Our results underscore that female bar and restaurant workers continue to be a priority population  
282 for African HIV treatment and prevention programs. While key population-based programs in Africa

283 include female sex workers, and many female bar workers are engaged in sex work, not all women  
284 working in bars and restaurants at high risk of HIV classify themselves as sex workers [21]. Multi-level,  
285 social influence, and structural HIV prevention interventions targeting alcohol-serving establishments,  
286 including enhanced sexually transmitted infection clinic services, portable health services, and peer  
287 education, have been shown to be effective in settings outside Africa, for reducing HIV risk and  
288 increasing treatment uptake [24, 25].

289         Prior research has shown that men working in transportation are highly mobile and often engage  
290 in transactional sex [26-28]. We found that the prevalence of untreated HIV did not significantly decline  
291 in this occupational sub-group with the availability of CHI. Prior research has linked male transportation  
292 workers, including truck drivers, to higher risk of HIV transmission [26], and has shown that men  
293 working in this occupation frequently engage with sex workers and women working in bars and  
294 restaurants [27, 29]. Supplies of free condoms, roadside clinics, and free HIV testing services at truck  
295 stops are some HIV prevention interventions that have targeted male transportation workers [10, 29];  
296 however, levels of awareness and uptake of such services in this population has been low [10, 30].

297         Adolescent girls and young women aged 15 to 24 years have a disproportionately high risk of  
298 HIV acquisition in Africa [31-33], but HIV risk was significantly lower among young people who list  
299 their occupation as “student” and who have higher education attainment, regardless of sex [34-37].  
300 During the study period, HIV prevalence declined in female students by nearly 90%. Incidence of HIV  
301 remained stable for both male and female students, but compared to those in agriculture, students of both  
302 sexes had lower HIV incidence during the late-CHI period. Research from South Africa has shown that  
303 students tend to have smaller sexual networks and are less likely to report high-risk sexual behaviors  
304 compared to those not in school [35]. Lower HIV incidence and prevalence among female students has  
305 also been attributed to avoiding the consequences of unprotected sex and increased self-efficacy for  
306 negotiating safer sex with their partners [38]. Interventions that increase school enrollment of adolescent  
307 girls and young women, such as PEPFAR’s Determined, Resilient, Empowered, AIDS-free, Mentored,

308 and Safe (DREAMS) program, may decrease sexual initiation, high-risk sexual behavior, and HIV risk  
309 [31]. Since the onset of the COVID-19 pandemic in Uganda during the spring of 2020, schools have  
310 remained fully or partially closed. Given the strong protective effects of schooling on HIV acquisition,  
311 understanding the extent to which school closures impact HIV and other reproductive health outcomes,  
312 such as unplanned pregnancy, is an urgent public health priority.

313 Earlier studies have established migration and mobility as a key risk factor for HIV acquisition  
314 and transmission [22, 39, 40]. Overall, we found that the occupations which tend to have high mobility  
315 also had higher prevalence of untreated HIV and HIV incidence despite CHI scale-up. Both female bar  
316 and restaurant work and male transportation work are associated with increased mobility as well as high-  
317 risk sexual behaviors, including concurrent sexual partnerships and inconsistent condom use [27, 28, 41].  
318 Specialized service-delivery tailored to mobile populations include the implementation of client-managed  
319 groups, adherence clubs, community drug distribution points, and multi-month prescriptions to reduce  
320 HIV burden in these populations [42-44].

321 The shifting distribution of the occupational makeup in our study population away from  
322 agriculture likely reflects the increasing urbanization happening across the African continent [45]. Little  
323 data exists on the impact of urbanization on HIV transmission; however, in sub-Saharan Africa, HIV  
324 prevalence and incidence have been reported to be higher in urban than in rural centers [46, 47]. This has  
325 been attributed to factors such as relative affluence in urban centers, increased social interaction, and  
326 higher-risk behaviors such as transactional sex and concurrent sexual partnerships [48-50]. More research  
327 is needed to elucidate the impact of increasing urbanization on HIV transmission within African  
328 populations.

329 Our study has important limitations. Occupation and ART use were self-reported and may be  
330 subject to bias. However, we have previously shown that self-reported ART has high specificity and  
331 moderate sensitivity in this same study population [17]. Sex work in Uganda is criminalized and was  
332 likely underreported in our survey [4]. Key population-focused HIV prevention programs began in this



333 region in 2017, after the time of the analysis, and so their impact cannot be assessed. However, our  
334 findings do support their focus on female sex workers. Our data suggest that other population sub-groups  
335 (beyond the currently defined key and priority population groups in Uganda) may merit additional HIV  
336 prevention focus, including bar and restaurant workers and short/medium distance transportation workers.  
337 While the longitudinal nature of this study is a strength, analysis of incident HIV infections was limited  
338 by a small number of events in some occupational subgroups, which may have obscured trends. Lastly,  
339 our results may not be generalizable to other populations, particularly in urban African settings where the  
340 nature of the association between occupation and HIV risk may differ.

341

## 342 **5. CONCLUSIONS**

343 In summary, prevalence of untreated HIV infection and HIV incidence declined in most  
344 occupational subgroups following the mass scale-up of HIV prevention and treatment interventions in  
345 rural southern Uganda. However, HIV burden remained relatively high in the traditionally high-risk  
346 occupations of male transportation and female bar and restaurant work. HIV programs that meet the  
347 unique needs of these high-risk populations, which tend to be more mobile with higher levels of HIV-  
348 associated risk behaviors, may help achieve HIV epidemic control.

349

350

351 **ACKNOWLEDGEMENTS**

352 We thank the RCCS participants and many staff and investigators who have made this study possible over  
353 the years. Additionally, we thank the personnel at the Office of Cyberinfrastructure and Computational  
354 Biology at the National Institute of Allergy and Infectious Diseases for data management support.

355

356 **FUNDING**

357 This study was supported by the National Institute of Allergy and Infectious Diseases (grants  
358 R01AI110324, U01AI100031, U01AI075115, R01AI102939, R01AI14333, R01AI155080, and  
359 K01AI125086-01), the National Institute of Mental Health (grants R01MH107275 and R01MH105313),  
360 the Eunice Kennedy Shriver National Institute of Child Health and Human Development (grants  
361 R01HD070769 and R01HD050180), the Division of Intramural Research of the National Institute for  
362 Allergy and Infectious Diseases, the Johns Hopkins University Center for AIDS Research (grant  
363 P30AI094189), and the President's Emergency Plan for AIDS Relief through the Centers for Disease  
364 Control and Prevention (grant NU2GGH000817). The findings and conclusions in this article are those of  
365 the authors and do not necessarily represent the official position of the funding agencies.

366

367 **CONFLICTS OF INTEREST**

368 Drs. Wawer and Gray are paid consultants to the Rakai Health Sciences Program and serves on its Board  
369 of Directors. These arrangements have been reviewed and approved by the Johns Hopkins University in  
370 accordance with its conflict of interest policies.

371

372  
373  
374  
375  
376  
377  
378  
379  
380  
381  
382  
383  
384  
385  
386  
387  
388  
389  
390  
391  
392  
393  
394  
395  
396  
397  
398  
399  
400  
401  
402  
403  
404  
405  
406  
407  
408  
409  
410  
411  
412  
413  
414  
415  
416  
417  
418  
419  
420

## REFERENCES

1. Joshi K, Lessler J, Olawore O, Loevinsohn G, Bushey S, Tobian AAR, et al. Declining HIV incidence in sub-Saharan Africa: a systematic review and meta-analysis of empiric data. medRxiv. 2020:2020.12.08.20246066.
2. UNAIDS. Report – AIDS 2020. UNAIDS; 2020 2020.
3. Diallo BL, Alary M, Rashed S, Barry A. [HIV prevalence, associated risk factors and evolution among truck drivers from 2001 to 2007 in Guinea]. *Med Trop (Mars)*. 2011;71(2):142-6.
4. Kagaayi J, Gray RH, Whalen C, Fu P, Neuhauser D, McGrath JW, et al. Indices to measure risk of HIV acquisition in Rakai, Uganda. *PloS one*. 2014;9(4):e92015.
5. Granich RM, Gilks CF, Dye C, De Cock KM, Williams BG. Universal voluntary HIV testing with immediate antiretroviral therapy as a strategy for elimination of HIV transmission: a mathematical model. *Lancet*. 2009;373(9657):48-57.
6. Hontelez JA, Lurie MN, Barnighausen T, Bakker R, Baltussen R, Tanser F, et al. Elimination of HIV in South Africa through expanded access to antiretroviral therapy: a model comparison study. *PLoS Med*. 2013;10(10):e1001534.
7. Bowen P, Govender R, Edwards P, Lake A. HIV infection in the South African construction industry. *Psychol Health Med*. 2018;23(5):612-8.
8. Mbugua GG, Muthami LN, Mutura CW, Oogo SA, Waiyaki PG, Lindan CP, et al. Epidemiology of HIV infection among long distance truck drivers in Kenya. *East Afr Med J*. 1995;72(8):515-8.
9. Mafigiri R, Matovu JK, Makumbi FE, Ndyababo A, Nabukalu D, Sakor M, et al. HIV prevalence and uptake of HIV/AIDS services among youths (15-24 Years) in fishing and neighboring communities of Kasensero, Rakai District, South Western Uganda. *BMC public health*. 2017;17(1):251.
10. Delany-Moretlwe S, Bello B, Kinross P, Oliff M, Chersich M, Kleinschmidt I, et al. HIV prevalence and risk in long-distance truck drivers in South Africa: a national cross-sectional survey. *International journal of STD & AIDS*. 2014;25(6):428-38.
11. Mabathoana RS, Wyk CV, Adefuye AO. Factors influencing HIV risk-taking behaviours amongst textile factory workers living with HIV in Lesotho. *Pan Afr Med J*. 2019;33:166.
12. Baltazar CS, Horth R, Inguane C, Sathane I, Cesar F, Ricardo H, et al. HIV prevalence and risk behaviors among Mozambicans working in South African mines. *AIDS and behavior*. 2015;19 Suppl 1:S59-67.
13. Grabowski MK, Serwadda DM, Gray RH, Nakigozi G, Kigozi G, Kagaayi J, et al. HIV Prevention Efforts and Incidence of HIV in Uganda. *N Engl J Med*. 2017;377(22):2154-66.
14. Wawer MJ, Sewankambo NK, Serwadda D, Quinn TC, Paxton LA, Kiwanuka N, et al. Control of sexually transmitted diseases for AIDS prevention in Uganda: a randomised community trial. Rakai Project Study Group. *Lancet*. 1999;353(9152):525-35.
15. Kagulire SC, Opendi P, Stamper PD, Nakavuma JL, Mills LA, Makumbi F, et al. Field evaluation of five rapid diagnostic tests for screening of HIV-1 infections in rural Rakai, Uganda. *International journal of STD & AIDS*. 2011;22(6):308-9.
16. Gray RH, Makumbi F, Serwadda D, Lutalo T, Nalugoda F, Opendi P, et al. Limitations of rapid HIV-1 tests during screening for trials in Uganda: diagnostic test accuracy study. *BMJ*. 2007;335:188.
17. Grabowski MK, Reynolds SJ, Kagaayi J, Gray RH, Clarke W, Chang LW, et al. The validity of self-reported antiretroviral use in persons living with HIV: a population-based study. *AIDS*. 2018;32(3):363-9.
18. Nagot N, Ouangre A, Ouedraogo A, Cartoux M, Huygens P, Defer MC, et al. Spectrum of commercial sex activity in Burkina Faso: classification model and risk of exposure to HIV. *J Acquir Immune Defic Syndr*. 2002;29(5):517-21.
19. Riedner G, Rusizoka M, Hoffmann O, Nichombe F, Lyamuya E, Mmbando D, et al. Baseline survey of sexually transmitted infections in a cohort of female bar workers in Mbeya Region, Tanzania. *Sex Transm Infect*. 2003;79(5):382-7.

- 421 20. Akoku DA, Tihnje MA, Vukugah TA, Tarkang EE, Mbu RE. Socio-economic vulnerabilities and  
422 HIV: Drivers of transactional sex among female bar workers in Yaounde, Cameroon. *PLoS one*.  
423 2018;13(6):e0198853.
- 424 21. Dambach P, Mahenge B, Mashasi I, Muya A, Barnhart DA, Barnighausen TW, et al. Socio-  
425 demographic characteristics and risk factors for HIV transmission in female bar workers in sub-Saharan  
426 Africa: a systematic literature review. *BMC public health*. 2020;20(1):697.
- 427 22. Olawore O, Tobian AAR, Kagaayi J, Bazaale JM, Nantume B, Kigozi G, et al. Migration and risk of  
428 HIV acquisition in Rakai, Uganda: a population-based cohort study. *Lancet HIV*. 2018;5(4):e181-e9.
- 429 23. Barnhart DA, Harling G, Muya A, Ortblad KF, Mashasi I, Dambach P, et al. Structural, interpersonal,  
430 psychosocial, and behavioral risk factors for HIV acquisition among female bar workers in Dar es  
431 Salaam, Tanzania. *AIDS Care*. 2019;31(9):1096-105.
- 432 24. Kalichman SC. Social and structural HIV prevention in alcohol-serving establishments: review of  
433 international interventions across populations. *Alcohol Res Health*. 2010;33(3):184-94.
- 434 25. Pitpitan EV, Kalichman SC. Reducing HIV Risks in the Places Where People Drink: Prevention  
435 Interventions in Alcohol Venues. *AIDS and behavior*. 2016;20 Suppl 1:S119-33.
- 436 26. Botao C, Horth RZ, Frank H, Cummings B, Inguane C, Sathane I, et al. Prevalence of HIV and  
437 Associated Risk Factors Among Long Distance Truck Drivers in Inchope, Mozambique, 2012. *AIDS and*  
438 *behavior*. 2016;20(4):811-20.
- 439 27. Costenbader EC, Lancaster K, Bufumbo L, Akol A, Guest G. On the road again: concurrency and  
440 condom use among Uganda truck drivers. *African journal of AIDS research : AJAR*. 2015;14(2):117-25.
- 441 28. Morris CN, Ferguson AG. Estimation of the sexual transmission of HIV in Kenya and Uganda on the  
442 trans-Africa highway: the continuing role for prevention in high risk groups. *Sex Transm Infect*.  
443 2006;82(5):368-71.
- 444 29. Makhakhe NF, Lane T, McIntyre J, Struthers H. Sexual transactions between long distance truck  
445 drivers and female sex workers in South Africa. *Glob Health Action*. 2017;10(1):1346164.
- 446 30. Kelvin EA, George G, Mwai E, Nyaga E, Mantell JE, Romo ML, et al. Offering self-administered  
447 oral HIV testing to truck drivers in Kenya to increase testing: a randomized controlled trial. *AIDS Care*.  
448 2018;30(1):47-55.
- 449 31. Birdthistle I, Tanton C, Tomita A, de Graaf K, Schaffnit SB, Tanser F, et al. Recent levels and trends  
450 in HIV incidence rates among adolescent girls and young women in ten high-prevalence African  
451 countries: a systematic review and meta-analysis. *Lancet Glob Health*. 2019;7(11):e1521-e40.
- 452 32. Blaizot S, Kim AA, Zeh C, Riche B, Maman D, De Cock KM, et al. Estimating HIV Incidence Using  
453 a Cross-Sectional Survey: Comparison of Three Approaches in a Hyperendemic Setting, Ndihiwa  
454 Subcounty, Kenya, 2012. *AIDS Res Hum Retroviruses*. 2017;33(5):472-81.
- 455 33. Kharsany AB, Buthelezi TJ, Frohlich JA, Yende-Zuma N, Samsunder N, Mahlase G, et al. HIV  
456 infection in high school students in rural South Africa: role of transmissions among students. *AIDS Res*  
457 *Hum Retroviruses*. 2014;30(10):956-65.
- 458 34. Barnighausen T, Hosegood V, Timaeus IM, Newell ML. The socioeconomic determinants of HIV  
459 incidence: evidence from a longitudinal, population-based study in rural South Africa. *AIDS*. 2007;21  
460 Suppl 7:S29-38.
- 461 35. Hargreaves JR, Morison LA, Kim JC, Bonell CP, Porter JD, Watts C, et al. The association between  
462 school attendance, HIV infection and sexual behaviour among young people in rural South Africa. *J*  
463 *Epidemiol Community Health*. 2008;62(2):113-9.
- 464 36. Pettifor AE, Levandowski BA, MacPhail C, Padian NS, Cohen MS, Rees HV. Keep them in school:  
465 the importance of education as a protective factor against HIV infection among young South African  
466 women. *Int J Epidemiol*. 2008;37(6):1266-73.
- 467 37. Santelli JS, Edelstein ZR, Mathur S, Wei Y, Zhang W, Orr MG, et al. Behavioral, biological, and  
468 demographic risk and protective factors for new HIV infections among youth in Rakai, Uganda. *J Acquir*  
469 *Immune Defic Syndr*. 2013;63(3):393-400.
- 470 38. Jukes M, Simmons S, Bundy D. Education and vulnerability: the role of schools in protecting young  
471 women and girls from HIV in southern Africa. *AIDS*. 2008;22 Suppl 4:S41-56.

- 472 39. McGrath N, Eaton JW, Newell ML, Hosegood V. Migration, sexual behaviour, and HIV risk: a  
473 general population cohort in rural South Africa. *Lancet HIV*. 2015;2(6):e252-9.
- 474 40. Phillips TK, Clouse K, Zerbe A, Orrell C, Abrams EJ, Myer L. Linkage to care, mobility and  
475 retention of HIV-positive postpartum women in antiretroviral therapy services in South Africa. *Journal of*  
476 *the International AIDS Society*. 2018;21 Suppl 4:e25114.
- 477 41. Harling G, Muya A, Ortblad KF, Mashasi I, Dambach P, Ulenga N, et al. HIV risk and pre-exposure  
478 prophylaxis interest among female bar workers in Dar es Salaam: cross-sectional survey. *BMJ open*.  
479 2019;9(3):e023272.
- 480 42. Grimsrud A, Barnabas RV, Ehrenkranz P, Ford N. Evidence for scale up: the differentiated care  
481 research agenda. *Journal of the International AIDS Society*. 2017;20(Suppl 4):22024.
- 482 43. Okoboi S, Ding E, Persuad S, Wangisi J, Birungi J, Shurgold S, et al. Community-based ART  
483 distribution system can effectively facilitate long-term program retention and low-rates of death and  
484 virologic failure in rural Uganda. *AIDS Res Ther*. 2015;12:37.
- 485 44. Alamo ST, Wagner GJ, Ouma J, Sunday P, Marie L, Colebunders R, et al. Strategies for optimizing  
486 clinic efficiency in a community-based antiretroviral treatment programme in Uganda. *AIDS and*  
487 *behavior*. 2013;17(1):274-83.
- 488 45. Angel S, Parent J, Civco DL, Blei A, Potere D. The dimensions of global urban expansion: Estimates  
489 and projections for all countries, 2000–2050. *Progress in Planning*. 2011;75(2):53-107.
- 490 46. Dyson T. HIV/AIDS and Urbanization. *Population and Development Review*. 2004;29(3):427-42.
- 491 47. Maulide Cane R, Melesse DY, Kayeyi N, Manu A, Wado YD, Barros A, et al. HIV trends and  
492 disparities by gender and urban-rural residence among adolescents in sub-Saharan Africa. *Reprod Health*.  
493 2021;18(Suppl 1):120.
- 494 48. Shelton JD, Cassell MM, Adetunji J. Is poverty or wealth at the root of HIV? *Lancet*.  
495 2005;366(9491):1057-8.
- 496 49. Hargreaves JR. Socioeconomic status and risk of HIV infection in an urban population in Kenya. *Trop*  
497 *Med Int Health*. 2002;7(9):793-802.
- 498 50. Awusabo-Asare K, Annim SK. Wealth status and risky sexual behaviour in Ghana and Kenya. *Appl*  
499 *Health Econ Health Policy*. 2008;6(1):27-39.

500

501

**Table 1.** Characteristics of the study population at the baseline visit within each CHI calendar period by gender.

| Characteristics                 | Women                                                 |                                                         |                                                         | Men                                                   |                                                         |                                                         |
|---------------------------------|-------------------------------------------------------|---------------------------------------------------------|---------------------------------------------------------|-------------------------------------------------------|---------------------------------------------------------|---------------------------------------------------------|
|                                 | Visit 1 (1999-2000),<br>Pre-CHI baseline<br>N = 3,474 | Visit 6 (2005-2006),<br>Early-CHI baseline<br>N = 4,683 | Visit 10 (2011-2013),<br>Late-CHI baseline<br>N = 3,758 | Visit 1 (1999-2000),<br>pre-CHP baseline<br>N = 2,518 | Visit 6 (1999-2000),<br>early CHP baseline<br>N = 3,298 | Visit 10 (2011-2013),<br>late CHP baseline<br>N = 2,944 |
| <b>Age, Median (IQR)</b>        | 25 (20-34)                                            | 27 (22-34)                                              | 28 (22, 35)                                             | 26 (20, 33)                                           | 28 (21, 35)                                             | 27 (20, 36)                                             |
| <b>Level of education</b>       |                                                       |                                                         |                                                         |                                                       |                                                         |                                                         |
| None                            | 261 (7.5%)                                            | 248 (5.3%)                                              | 159 (4.2%)                                              | 115 (4.6%)                                            | 127 (3.9%)                                              | 95 (3.2%)                                               |
| Primary Education               | 2312 (67%)                                            | 2883 (62%)                                              | 2082 (55%)                                              | 1653 (66%)                                            | 2050 (62%)                                              | 1765 (60%)                                              |
| Secondary Education             | 779 (22%)                                             | 1245 (27%)                                              | 1206 (32%)                                              | 545 (22%)                                             | 837 (25%)                                               | 814 (28%)                                               |
| Tertiary Education              | 119 (3.4%)                                            | 297 (6.3%)                                              | 279 (7.4%)                                              | 203 (8.1%)                                            | 259 (7.9%)                                              | 214 (7.3%)                                              |
| Missing                         | 3 (0.1%)                                              | 10 (0.2%)                                               | 32 (0.9%)                                               | 2 (0.1%)                                              | 25 (0.8%)                                               | 56 (1.9%)                                               |
| <b>Marital status</b>           |                                                       |                                                         |                                                         |                                                       |                                                         |                                                         |
| Married                         | 2056 (59%)                                            | 2811 (60%)                                              | 2265 (60%)                                              | 1418 (56%)                                            | 1901 (58%)                                              | 1524 (52%)                                              |
| Never married                   | 781 (23%)                                             | 1045 (22%)                                              | 830 (22%)                                               | 925 (37%)                                             | 1153 (35%)                                              | 1182 (40%)                                              |
| Previously Married              | 637 (18%)                                             | 827 (18%)                                               | 663 (18%)                                               | 175 (6.9%)                                            | 244 (7.4%)                                              | 238 (8.1%)                                              |
| <b>Religion</b>                 |                                                       |                                                         |                                                         |                                                       |                                                         |                                                         |
| None                            | 20 (0.6%)                                             | 17 (0.4%)                                               | 11 (0.3%)                                               | 15 (0.6%)                                             | 15 (0.5%)                                               | 11 (0.4%)                                               |
| Catholic                        | 2388 (69%)                                            | 3061 (65%)                                              | 2364 (63%)                                              | 1713 (68%)                                            | 2168 (66%)                                              | 1867 (63%)                                              |
| Protestant                      | 596 (17%)                                             | 843 (18%)                                               | 631 (17%)                                               | 449 (18%)                                             | 563 (17%)                                               | 488 (17%)                                               |
| Pentecostal                     | 43 (1.2%)                                             | 123 (2.6%)                                              | 162 (4.3%)                                              | 32 (1.3%)                                             | 93 (2.8%)                                               | 131 (4.4%)                                              |
| Muslim                          | 411 (12%)                                             | 607 (13%)                                               | 540 (14%)                                               | 301 (12.0%)                                           | 426 (13%)                                               | 380 (13%)                                               |
| Other                           | 13 (0.4%)                                             | 20 (0.4%)                                               | 18 (0.5%)                                               | 6 (0.2%)                                              | 8 (0.2%)                                                | 11 (0.4%)                                               |
| Missing                         | 3 (0.1%)                                              | 12 (0.2%)                                               | 32 (0.9%)                                               | 2 (0.1%)                                              | 25 (0.8%)                                               | 56 (2%)                                                 |
| <b>Male circumcision</b>        |                                                       |                                                         |                                                         |                                                       |                                                         |                                                         |
| Yes                             | -                                                     | -                                                       | -                                                       | 374 (15%)                                             | 697 (21%)                                               | 1359 (46%)                                              |
| No                              | -                                                     | -                                                       | -                                                       | 2112 (84%)                                            | 2516 (76%)                                              | 1585 (54%)                                              |
| <b>Untreated HIV prevalence</b> | 15.6%                                                 | 11.1%                                                   | 9.1%                                                    | 10.5%                                                 | 8.1%                                                    | 6.4%                                                    |

CHI=combination HIV intervention; Untreated HIV prevalence: prevalence of HIV-infected individuals who have not received antiretroviral therapy; IQR=interquartile range; Pre-CHI: 1999-2004; Early-CHI: 2005-2011; Late-CHI: 2012-2016

**Table 2a:** Prevalence of self-reported ART use among HIV-positive women during the early and late-CHI periods and at the final study visit (Visit 12).

|                          | Early – CHI (2004-2011)<br>N=3,352 |                          |                         | Late – CHI (2011-2016)<br>N=2,695 |                          |                         | Visit 12<br>N=1,059           |                         |                         |
|--------------------------|------------------------------------|--------------------------|-------------------------|-----------------------------------|--------------------------|-------------------------|-------------------------------|-------------------------|-------------------------|
|                          | % self-reporting<br>ART (n/T)      | PRR<br>(95% CI)          | adjPRR<br>(95% CI)      | % self-reporting<br>ART (n/T)     | PRR<br>(95% CI)          | adjPRR<br>(95% CI)      | % self-reporting<br>ART (n/T) | PRR<br>(95% CI)         | adjPRR<br>(95% CI)      |
| Agriculture              | 24.9<br>(432/1734)                 | Ref                      | Ref                     | 64.6<br>(811/1256)                | Ref                      | Ref                     | 78.0<br>(375/481)             | Ref                     | Ref                     |
| Trading                  | 25.5<br>(149/584)                  | 1.02<br>(0.87 - 1.20)    | 1.04<br>(0.89 - 1.22)   | 56.9<br>(302/531)                 | 0.88***<br>(0.81 - 0.96) | 0.91**<br>(0.83 - 0.98) | 68.2<br>(137/201)             | 0.87**<br>(0.79 - 0.97) | 0.90**<br>(0.81 - 0.99) |
| Casual labor             | -                                  | -                        | -                       | -                                 | -                        | -                       | -                             | -                       | -                       |
| Civil service            | 19.5<br>(42/215)                   | 0.78*<br>(0.59 - 1.04)   | 0.89<br>(0.68 - 1.17)   | 58.2<br>(85/146)                  | 0.90<br>(0.78 - 1.04)    | 0.93<br>(0.81 - 1.07)   | 70.2<br>(40/57)               | 0.90<br>(0.76 - 1.07)   | 0.93<br>(0.78 - 1.11)   |
| Student                  | 11.8<br>(2/17)                     | 0.47<br>(0.13 - 1.74)    | 1.31<br>(0.35 - 4.92)   | 38.0<br>(19/50)                   | 0.59***<br>(0.41 - 0.84) | 0.83<br>(0.58 - 1.20)   | 53.3<br>(16/30)               | 0.68**<br>(0.49 - 0.96) | 0.86<br>(0.60 - 1.22)   |
| Bar/restaurant<br>worker | 22.7<br>(65/287)                   | 0.91<br>(0.72 - 1.14)    | 0.95<br>(0.76 - 1.20)   | 55.9<br>(160/286)                 | 0.87**<br>(0.78 - 0.97)  | 0.89**<br>(0.80 - 0.99) | 71.2<br>(79/111)              | 0.91<br>(0.80 - 1.04)   | 0.93<br>(0.82 - 1.06)   |
| Local crafts             | 12.8<br>(12/94)                    | 0.51**<br>(0.30 - 0.88)  | 0.57**<br>(0.34 - 0.95) | 50.0<br>(32/64)                   | 0.77**<br>(0.60 - 0.99)  | 0.82<br>(0.65 - 1.05)   | 58.8<br>(20/34)               | 0.76*<br>(0.57 - 1.00)  | 0.79<br>(0.60 - 1.05)   |
| Hairdressing             | 21.0<br>(22/105)                   | 0.84<br>(0.58 - 1.23)    | 1.13<br>(0.76 - 1.66)   | 54.3<br>(51/94)                   | 0.84*<br>(0.70 - 1.02)   | 0.95<br>(0.79 - 1.15)   | 65.9<br>(27/41)               | 0.85<br>(0.67 - 1.06)   | 0.92<br>(0.74 - 1.15)   |
| Tailoring/laundry        | 23.7<br>(9/38)                     | 0.95<br>(0.53 - 1.69)    | 1.07<br>(0.66 - 1.75)   | 60.0<br>(18/30)                   | 0.93<br>(0.69 - 1.25)    | 0.99<br>(0.75 - 1.31)   | 75.0<br>(12/16)               | 0.96<br>(0.72 - 1.28)   | 1.01<br>(0.75 - 1.35)   |
| Housekeeping             | 12.4<br>(28/226)                   | 0.50***<br>(0.35 - 0.71) | 0.73*<br>(0.52 - 1.04)  | 52.5<br>(94/179)                  | 0.81***<br>(0.70 - 0.94) | 0.96<br>(0.83 - 1.11)   | 63.8<br>(44/69)               | 0.82**<br>(0.68 - 0.98) | 0.90<br>(0.75 - 1.08)   |
| Other occupations        | 23.1<br>(12/52)                    | 0.93<br>(0.56 - 1.53)    | 0.82<br>(0.50 - 1.33)   | 66.1<br>(39/59)                   | 1.02<br>(0.85 - 1.24)    | 1.04<br>(0.85 - 1.27)   | 79.0<br>(15/19)               | 1.01<br>(0.80 - 1.28)   | 1.05<br>(0.82 - 1.36)   |

**Table 2b:** Prevalence of self-reported ART use among HIV-positive women during the early and late-CHI periods and at the final study visit (Visit 12).

|                   | Early – CHI (2004-2011)<br>N=1,702 |                          |                            | Late – CHI (2011-2016)<br>N=1,260 |                          |                          | Visit 12<br>N=464             |                          |                        |
|-------------------|------------------------------------|--------------------------|----------------------------|-----------------------------------|--------------------------|--------------------------|-------------------------------|--------------------------|------------------------|
|                   | % self-reporting<br>ART (n/T)      | PRR<br>(95% CI)          | adjPRR<br>(95% CI)         | % self-reporting<br>ART (n/T)     | PRR<br>(95% CI)          | adjPRR<br>(95% CI)       | % self-reporting<br>ART (n/T) | PRR<br>(95% CI)          | adjPRR<br>(95% CI)     |
| Agriculture       | 21.2<br>(140/661)                  | Ref                      | Ref                        | 54.4<br>(262/482)                 | Ref                      | Ref                      | 64.5<br>(118/183)             | Ref                      | Ref                    |
| Construction      | 7.8<br>(14/180)                    | 0.37***<br>(0.22 - 0.62) | 0.48***<br>(0.29 - 0.80)   | 41.0<br>(64/156)                  | 0.76***<br>(0.62 - 0.93) | 0.86<br>(0.70 - 1.06)    | 55.6<br>(30/54)               | 0.86<br>(0.66 - 1.12)    | 0.91<br>(0.69 - 1.19)  |
| Trading           | 14.9<br>(47/316)                   | 0.70**<br>(0.52 - 0.95)  | 0.76*<br>(0.57 - 1.01)     | 42.0<br>(94/224)                  | 0.77***<br>(0.65 - 0.92) | 0.80***<br>(0.67 - 0.94) | 57.8<br>(48/83)               | 0.90<br>(0.73 - 1.11)    | 0.91<br>(0.74 - 1.12)  |
| Casual labor      | 21.7<br>(15/69)                    | 1.03<br>(0.64 - 1.64)    | 1.26<br>(0.79 - 2.02)      | 36.9<br>(24/65)                   | 0.68**<br>(0.49 - 0.94)  | 0.70**<br>(0.51 - 0.96)  | 59.1<br>(13/22)               | 0.92<br>(0.64 - 1.32)    | 0.91<br>(0.64 - 1.29)  |
| Civil service     | 24.5<br>(34/139)                   | 1.16<br>(0.83 - 1.60)    | 0.96<br>(0.69 - 1.34)      | 60.6<br>(43/71)                   | 1.11<br>(0.91 - 1.37)    | 1.03<br>(0.84 - 1.25)    | 84.6<br>(22/26)               | 1.31***<br>(1.08 - 1.60) | 1.21*<br>(1.00 - 1.48) |
| Student           | 33.3 (4/12)                        | 1.57<br>(0.70 - 3.55)    | 11.83***<br>(4.72 - 29.68) | 35.7 (5/14)                       | 0.66<br>(0.32 - 1.33)    | 1.20<br>(0.56 - 2.55)    | 50.0 (3/6)                    | 0.78<br>(0.35 - 1.74)    | 1.21<br>(0.49 - 2.96)  |
| Mechanic          | 18.6<br>(11/59)                    | 0.88<br>(0.51 - 1.53)    | 0.87<br>(0.54 - 1.40)      | 43.3<br>(13/30)                   | 0.80<br>(0.53 - 1.21)    | 0.80<br>(0.52 - 1.23)    | 50.0 (7/14)                   | 0.78<br>(0.45 - 1.32)    | 0.82<br>(0.50 - 1.34)  |
| Transportation    | 15.4<br>(18/117)                   | 0.73<br>(0.46 - 1.14)    | 1.01<br>(0.67 - 1.52)      | 42.9<br>(48/112)                  | 0.79**<br>(0.63 - 0.99)  | 0.94<br>(0.76 - 1.17)    | 52.6<br>(20/38)               | 0.82<br>(0.59 - 1.13)    | 0.94<br>(0.70 - 1.28)  |
| Other occupations | 16.1<br>(24/149)                   | 0.76<br>(0.51 - 1.13)    | 0.83<br>(0.57 - 1.21)      | 50.9<br>(54/106)                  | 0.94<br>(0.76 - 1.15)    | 1.01<br>(0.83 - 1.24)    | 60.5<br>(23/38)               | 0.94<br>(0.71 - 1.24)    | 0.99<br>(0.76 - 1.29)  |



**Table 3.** Change in prevalence of untreated HIV infection between visit 1 (1999-2000) and visit 12 (2015-2016)

| Occupational subgroup | Women<br>N = 10,121                                                |                                                                     |                         |                         |                | Men<br>N = 7,876                                                    |                                                                      |                         |                         |                |
|-----------------------|--------------------------------------------------------------------|---------------------------------------------------------------------|-------------------------|-------------------------|----------------|---------------------------------------------------------------------|----------------------------------------------------------------------|-------------------------|-------------------------|----------------|
|                       | Visit 1 (1999-2000), untreated HIV prevalence, % (n/T)<br>n = 3474 | Visit 12 (2015-2016), untreated HIV prevalence, % (n/T)<br>n = 6647 | Unadjusted PRR (95% CI) | adjPRR* (95% CI)        | adjPRR p-value | Visit 1 (1999-2000), untreated HIV prevalence, % (n/T)<br>n = 2,518 | Visit 12 (2015-2016), untreated HIV prevalence, % (n/T)<br>n = 5,358 | Unadjusted PRR (95% CI) | adjPRR** (95% CI)       | adjPRR p-value |
| Agriculture           | 14.7 (313/2128)                                                    | 4.0 (106/2669)                                                      | <b>0.27 (0.22-0.23)</b> | <b>0.22 (0.18-0.27)</b> | <0.001         | 12.3 (120/975)                                                      | 4.2 (65/1538)                                                        | <b>0.34 (0.26-0.46)</b> | <b>0.30 (0.23-0.41)</b> | <0.001         |
| Construction          | -                                                                  | -                                                                   | -                       | -                       | -              | 12.6 (36/285)                                                       | 4.8 (24/500)                                                         | <b>0.38 (0.23-0.62)</b> | <b>0.27 (0.17-0.43)</b> | <0.001         |
| Trading               | 21.5 (70/325)                                                      | 6.1 (64/1048)                                                       | <b>0.28 (0.21-0.39)</b> | <b>0.09 (0.06-0.12)</b> | <0.001         | 13.5 (51/401)                                                       | 4.6 (35/756)                                                         | <b>0.36 (0.24-0.55)</b> | <b>0.27 (0.17-0.43)</b> | <0.001         |
| Casual labor          | -                                                                  | -                                                                   | -                       | -                       | -              | 10.6 (7/66)                                                         | 6.8 (9/132)                                                          | 0.64 (0.25-1.65)        | 0.54 (0.22-1.35)        | 0.185          |
| Civil service         | 11.2 (19/170)                                                      | 3.2 (17/529)                                                        | <b>0.29 (0.15-0.54)</b> | <b>0.07 (0.04-0.15)</b> | <0.001         | 10.4 (23/221)                                                       | 0.9 (4/429)                                                          | <b>0.09 (0.03-0.26)</b> | <b>0.09 (0.03-0.25)</b> | <0.001         |
| Student               | 2.4 (6/254)                                                        | 1.5 (14/959)                                                        | <b>0.62 (0.24-1.59)</b> | <b>0.11 (0.04-0.30)</b> | <0.001         | 0.6 (2/319)                                                         | 0.3 (3/1178)                                                         | 0.41 (0.07-2.42)        | 0.23 (0.04-1.19)        | 0.079          |
| Mechanic              | -                                                                  | -                                                                   | -                       | -                       | -              | 9.7 (6/62)                                                          | 2.3 (7/302)                                                          | <b>0.24 (0.08-0.69)</b> | <b>0.22 (0.07-0.67)</b> | <b>0.007</b>   |
| Transportation        | -                                                                  | -                                                                   | -                       | -                       | -              | 8.2 (4/49)                                                          | 7.1 (18/252)                                                         | 0.88 (0.31-2.47)        | 0.90 (0.30-2.73)        | 0.858          |
| Bar/Restaurant worker | 34.7 (50/144)                                                      | 12.0 (32/267)                                                       | <b>0.35 (0.23-0.51)</b> | <b>0.21 (0.14-0.31)</b> | <0.001         | -                                                                   | -                                                                    | -                       | -                       | -              |
| Local crafts          | 19.8 (20/101)                                                      | 10.2 (14/137)                                                       | <b>0.52 (0.27-0.97)</b> | <b>0.29 (0.14-0.58)</b> | <0.001         | -                                                                   | -                                                                    | -                       | -                       | -              |
| Hairdressing          | 46.3 (19/41)                                                       | 4.7 (14/300)                                                        | <b>0.10 (0.05-0.19)</b> | <b>0.01 (0.01-0.02)</b> | <0.001         | -                                                                   | -                                                                    | -                       | -                       | -              |
| Tailoring/laundry     | 4.0 (2/50)                                                         | 3.3 (4/122)                                                         | 0.82 (0.16-4.33)        | 0.25 (0.05-1.35)        | 0.107          | -                                                                   | -                                                                    | -                       | -                       | -              |
| Housekeeping          | 16.7 (38/227)                                                      | 4.6 (25/545)                                                        | <b>0.27 (0.17-0.44)</b> | <b>0.11 (0.07-0.17)</b> | <0.001         | -                                                                   | -                                                                    | -                       | -                       | -              |
| Other occupations     | 17.6 (6/34)                                                        | 5.6 (4/71)                                                          | 0.32 (0.10-1.06)        | 0.28 (0.08-1.02)        | 0.053          | 11.4 (16/140)                                                       | 5.5 (15/271)                                                         | <b>0.48 (0.25-0.95)</b> | <b>0.48 (0.25-0.96)</b> | <b>0.037</b>   |
| All occupations       | 15.6 (543/3474)                                                    | 4.4 (294/6647)                                                      | <b>0.28 (0.25-0.32)</b> | <b>0.27 (0.24-0.31)</b> | <0.001         | 10.5 (265/2518)                                                     | 3.4 (180/5358)                                                       | <b>0.32 (0.27-0.38)</b> | <b>0.29 (0.24-0.35)</b> | <0.001         |

PRR=prevalence risk ratios; adjPRR=adjusted prevalence risk; \*Models adjusted for age and marital status of study participants.

**Table 4.** Incidence of HIV infection by occupational subgroup, sex, and CHI (combination HIV intervention) calendar period.

| Occupation            | Women (N=17,840)                 |                            |                           |                                  |                                  |                                  |                                 |
|-----------------------|----------------------------------|----------------------------|---------------------------|----------------------------------|----------------------------------|----------------------------------|---------------------------------|
|                       | Incidence rate per 100 py (n/py) |                            |                           | IRR (95% CI)                     |                                  | adjIRR (95%CI)                   |                                 |
|                       | Pre – CHI<br>(1999-2004)         | Early – CHI<br>(2004-2011) | Late – CHI<br>(2011-2016) | Early – CHI vs.<br>Pre-CHI (ref) | Late – CHI vs. Pre-<br>CHI (ref) | Early – CHI vs.<br>Pre-CHI (ref) | Late – CHI vs.<br>Pre-CHI (ref) |
| Agriculture           | 1.1 (97/8490)                    | 0.9 (129/13785)            | 0.7 (62/9515)             | 0.82 (0.63 – 1.07)               | <b>0.57* (0.41 - 0.79)</b>       | 0.87 (0.67 – 1.13)               | <b>0.62* (0.45 - 0.86)</b>      |
| Bar/restaurant worker | 1.1 (4/365)                      | 2.1 (17/813)               | 2.0 (12/605)              | 1.91 (0.64 – 5.69)               | 1.81 (0.58 – 5.66)               | 2.13 (0.72 – 6.36)               | 2.79 (0.85 - 9.19)              |
| Trading               | 1.4 (17/1222)                    | 1.4 (49/3474)              | 0.7 (23/3117)             | 1.01 (0.58 - 1.77)               | <b>0.53* (0.28 – 1.00)</b>       | 1.19 (0.69 – 2.06)               | 0.72 (0.38 - 1.37)              |
| Hairdressing          | 2.3 (3/133)                      | 1.6 (10/624)               | 0.8 (6/774)               | 0.71 (0.19 – 2.62)               | 0.34 (0.08 – 1.39)               | 0.73 (0.20 - 2.68)               | 0.36 (0.09 – 1.43)              |
| Civil service         | 1.1 (9/851)                      | 0.6 (14/2399)              | 0.3 (5/1849)              | 0.55 (0.24 - 1.28)               | <b>0.26* (0.09 – 0.77)</b>       | 0.76 (0.31 - 1.86)               | 0.49 (0.13 - 1.78)              |
| Student               | 0.3 (2/623)                      | 0.4 (6/1433)               | 0.7 (14/2059)             | 1.30 (0.26 – 6.48)               | 2.12 (0.48 - 9.35)               | 1.23 (0.25 – 6.11)               | 1.93 (0.44 – 8.36)              |
| Housekeeping          | 1.2 (6/496)                      | 1.1 (15/1388)              | 0.9 (12/1278)             | 0.89 (0.35-2.32)                 | 0.78 (0.29-2.08)                 | 1.0 (0.37-2.67)                  | 0.89 (0.30-2.59)                |
| Local crafts          | 1.3 (5/387)                      | 2.3 (12/518)               | 1.6 (5/308)               | 1.79 (0.63 – 5.13)               | 1.25 (0.36 – 4.38)               | 1.88 (0.65 – 5.44)               | 1.36 (0.38 – 4.91)              |
| Tailoring/laundry     | 1.7 (2/121)                      | 1.4 (5/355)                | 1.1 (3/261)               | 0.86 (0.16-4.47)                 | 0.70 (0.12-4.23)                 | 0.94 (0.17-5.10)                 | 0.85 (0.15-4.84)                |
| Other occupations     | 1.1 (1/93)                       | 0.0 (0/169)                | 1.2 (5/406)               | -                                | 1.14 (0.13 - 9.96)               | -                                | 1.41 (0.16-12.48)               |
| All occupations       | 1.1 (146/12781)                  | 1.0 (257/24958)            | 0.7 (147/20173)           | 0.90 (0.74 - 1.11)               | <b>0.64* (0.51 - 0.80)</b>       | 0.93 (0.76-1.14)                 | <b>0.66* (0.53-0.83)</b>        |
| Men (N=14,244)        |                                  |                            |                           |                                  |                                  |                                  |                                 |
| Occupation            | Incidence rate per 100 py (n/py) |                            |                           | IRR (95% CI)                     |                                  | adjIRR (95%CI)                   |                                 |
|                       | Pre – CHI<br>(1999-2004)         | Early – CHI<br>(2004-2011) | Late – CHI<br>(2011-2016) | Early – CHI vs.<br>Pre-CHI (ref) | Late – CHI vs Pre-<br>CHI (ref)  | Early – CHI vs.<br>Pre-CHI (ref) | Late – CHI vs<br>Pre-CHI (ref)  |
| Agriculture           | 1.4 (53/3894)                    | 0.8 (62/8046)              | 0.4 (25/5834)             | <b>0.57* (0.39 - 0.82)</b>       | <b>0.32* (0.20 - 0.51)</b>       | <b>0.58* (0.40 - 0.84)</b>       | <b>0.33* (0.21 - 0.54)</b>      |
| Construction          | 1.6 (18/1128)                    | 1.2 (28/2322)              | 0.5 (9/1690)              | 0.76 (0.42 - 1.37)               | <b>0.33* (0.15 - 0.75)</b>       | 0.79 (0.42 - 1.47)               | <b>0.35* (0.15 - 0.83)</b>      |
| Trading               | 0.8 (13/1541)                    | 0.7 (26/3613)              | 0.5 (15/2746)             | 0.85 (0.44 - 1.67)               | 0.65 (0.31 - 1.37)               | 0.89 (0.46 - 1.70)               | 0.69 (0.33 - 1.45)              |
| Casual labor          | 1.2 (3/259)                      | 1.6 (7/431)                | 0.6 (2/322)               | 1.40 (0.36 - 5.49)               | 0.54 (0.09 - 3.25)               | 1.67 (0.42 - 6.66)               | 0.68 (0.11 - 4.30)              |
| Civil service         | 0.7 (7/981)                      | 0.6 (12/2121)              | 0.4 (6/1673)              | 0.79 (0.31 - 2.02)               | 0.50 (0.17 - 1.50)               | 0.78 (0.31 - 2.00)               | 0.49 (0.16 - 1.51)              |
| Student               | 0.1 (1/955)                      | 0.05 (1/1905)              | 0.1 (3/2840)              | 0.50 (0.03 - 8.03)               | 1.01 (0.11 - 9.71)               | 0.51 (0.03 - 8.23)               | 0.44 (0.04 - 4.86)              |
| Mechanic              | 0.0 (0/228)                      | 1.0 (8/780)                | 0.4 (4/901)               | -                                | -                                | -                                | -                               |
| Transportation        | 1.4 (4/287)                      | 1.8 (21/1181)              | 1.2 (12/964)              | 1.28 (0.43 - 3.75)               | 0.89 (0.29 - 2.80)               | 1.33 (0.45 - 3.91)               | 1.10 (0.35 - 3.50)              |
| Other occupations     | 1.8 (10/546)                     | 1.9 (21/1099)              | 0.9 (10/1115)             | 1.04 (0.49 - 2.23)               | 0.49 (0.20 - 1.19)               | 1.06 (0.50 - 2.26)               | 0.50 (0.21 - 1.23)              |
| All occupations       | 1.1 (109/9821)                   | 0.9 (186/21498)            | 0.5 (86/18085)            | <b>0.78* (0.62 - 0.99)</b>       | <b>0.43* (0.32 - 0.57)</b>       | <b>0.79* (0.62 - 1.0)</b>        | <b>0.44* (0.33 - 0.59)</b>      |

py=person years; IRR=incidence rate ratio; adjIRR=adjusted incidence rate ratio for age and marital status; IRR not presented for other occupations (women, Early-CHI) and mechanic (men) because there were no cases in the numerator and denominator respectively; CHI=combination HIV intervention \*p<0.05

**Table 5.** Adjusted incidence rate ratios of HIV infection comparing all occupations vs. agriculture during the late-CHI period

| Occupation            | Women                   |              | Men                     |              |
|-----------------------|-------------------------|--------------|-------------------------|--------------|
|                       | adjIRR (95% CI)         | p-value      | adjIRR (95% CI)         | p-value      |
| Agriculture           | Ref.                    | Reference    | Reference               | Reference    |
| Construction          | -                       | -            | 1.16 (0.54-2.48)        | 0.707        |
| Trading               | 1.1 (0.66-1.73)         | 0.800        | 1.25 (0.66-2.37)        | 0.501        |
| Casual labor          | -                       | -            | 1.45 (0.33-6.39)        | 0.623        |
| Civil service         | 0.40 (0.16-1.00)        | 0.051        | 0.87 (0.36-2.13)        | 0.767        |
| Student               | <b>0.36 (0.18-0.72)</b> | <b>0.004</b> | <b>0.19 (0.05-0.73)</b> | <b>0.015</b> |
| Mechanic              | -                       | -            | 0.91 (0.30-2.83)        | 0.875        |
| Transportation        | -                       | -            | <b>2.75 (1.37-5.50)</b> | <b>0.004</b> |
| Bar/restaurant worker | <b>2.88 (1.51-5.49)</b> | <b>0.001</b> | -                       | -            |
| Local crafts          | 1.96 (0.76-5.06)        | 0.164        | -                       | -            |
| Hairdressing          | 0.76 (0.32-1.79)        | 0.523        | -                       | -            |
| Tailoring/laundry     | 1.33 (0.40-4.42)        | 0.640        | -                       | -            |
| Housekeeping          | 1.08 (0.57-2.04)        | 0.819        | -                       | -            |

adjIRR=adjusted incidence rate ratio for age and marital status

Occupations where the median number of observations per visit was <50 were excluded from the analysis.

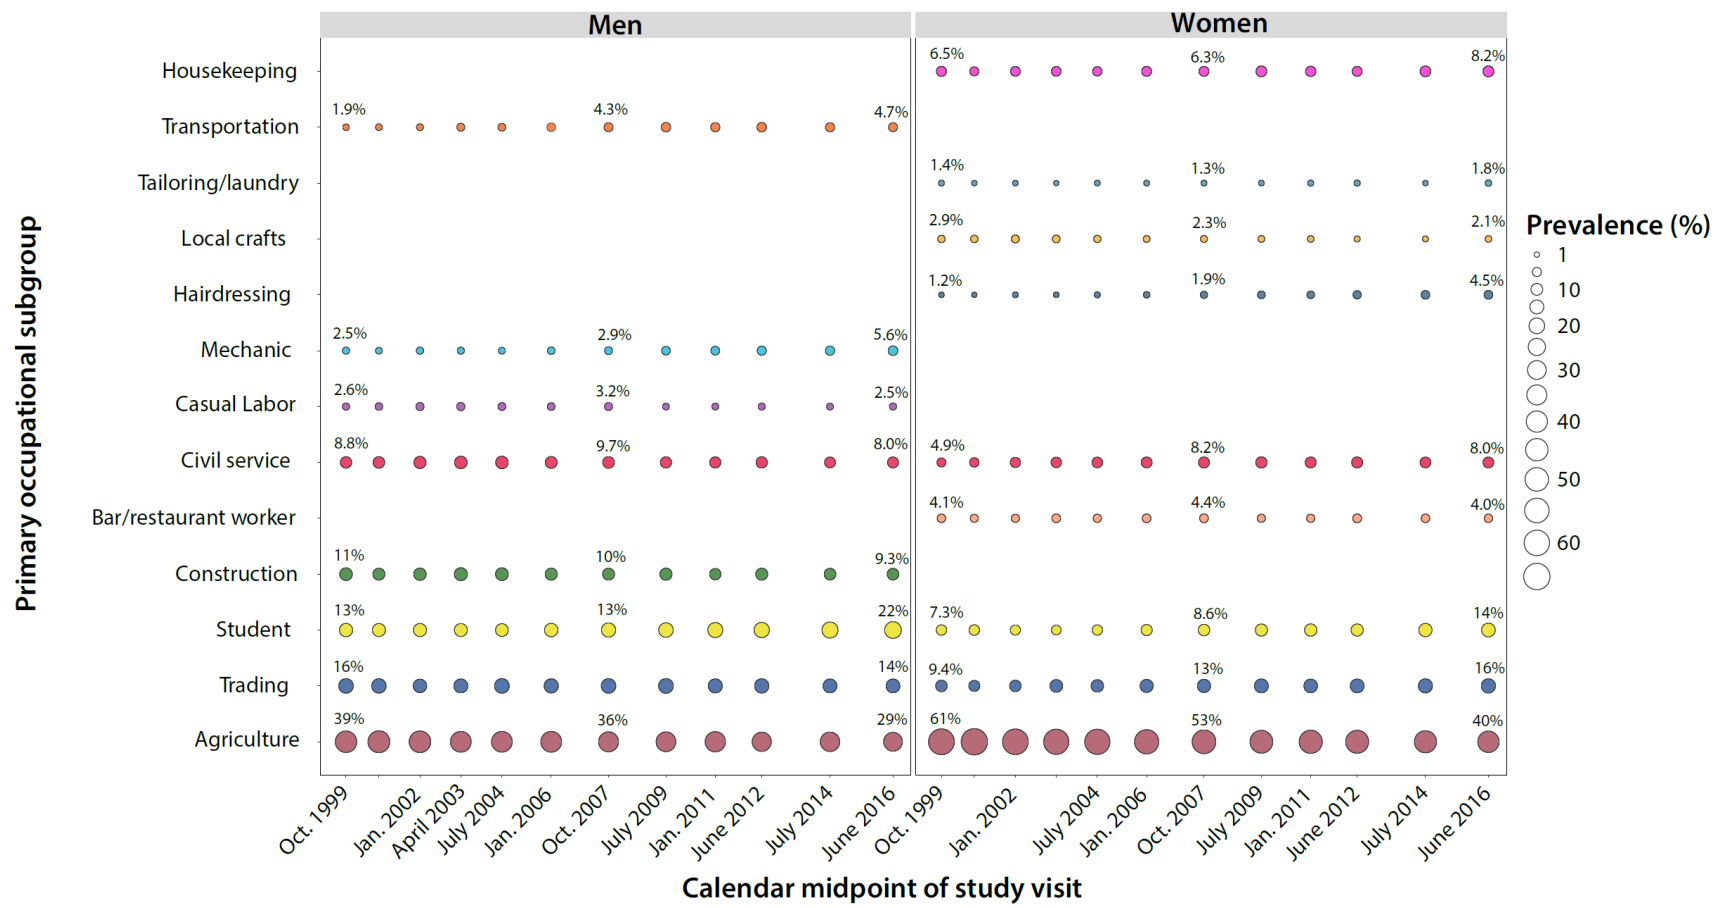

**Figure 1.** Prevalence of common primary occupational subgroups by sex in the Rakai Community Cohort Study, 1999-2016.

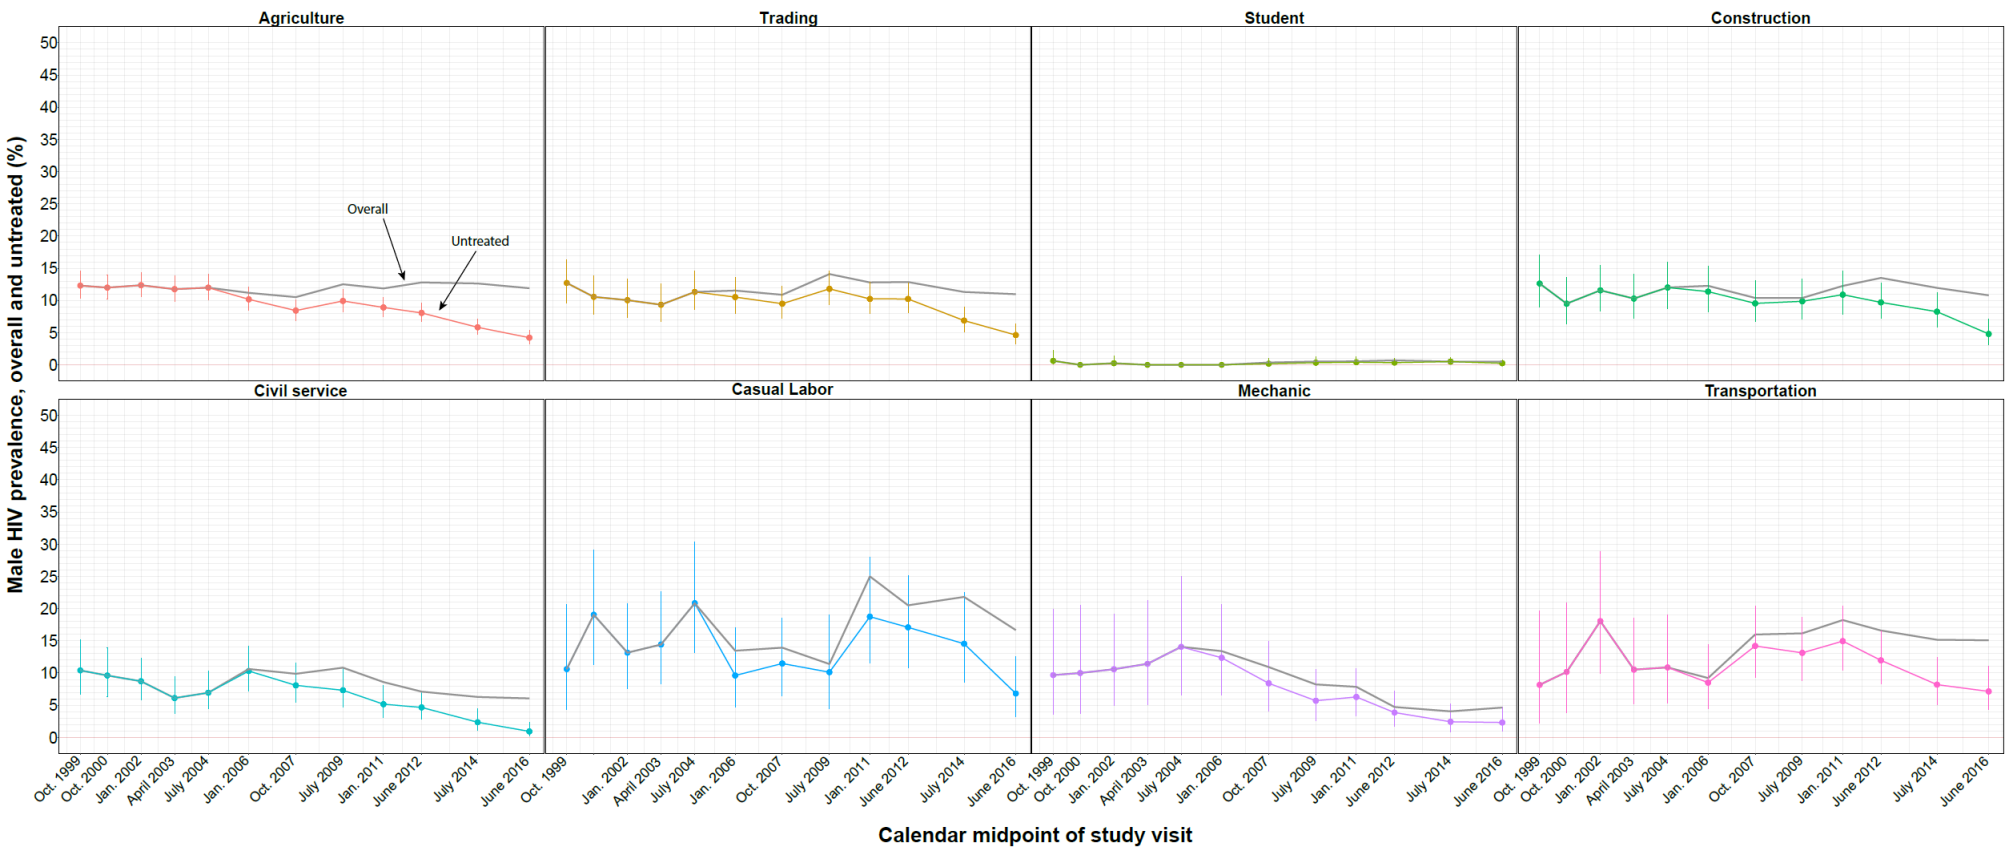

**Figure 2a.** Trends in HIV prevalence overall (treated and untreated) among men by primary occupational subgroup in the Rakai Community Cohort Study, 1999-2016; Untreated prevalence with 95% confidence intervals are shown in color; overall HIV prevalence is shown in gray. Data are plotted at the calendar midpoint of the study visit.

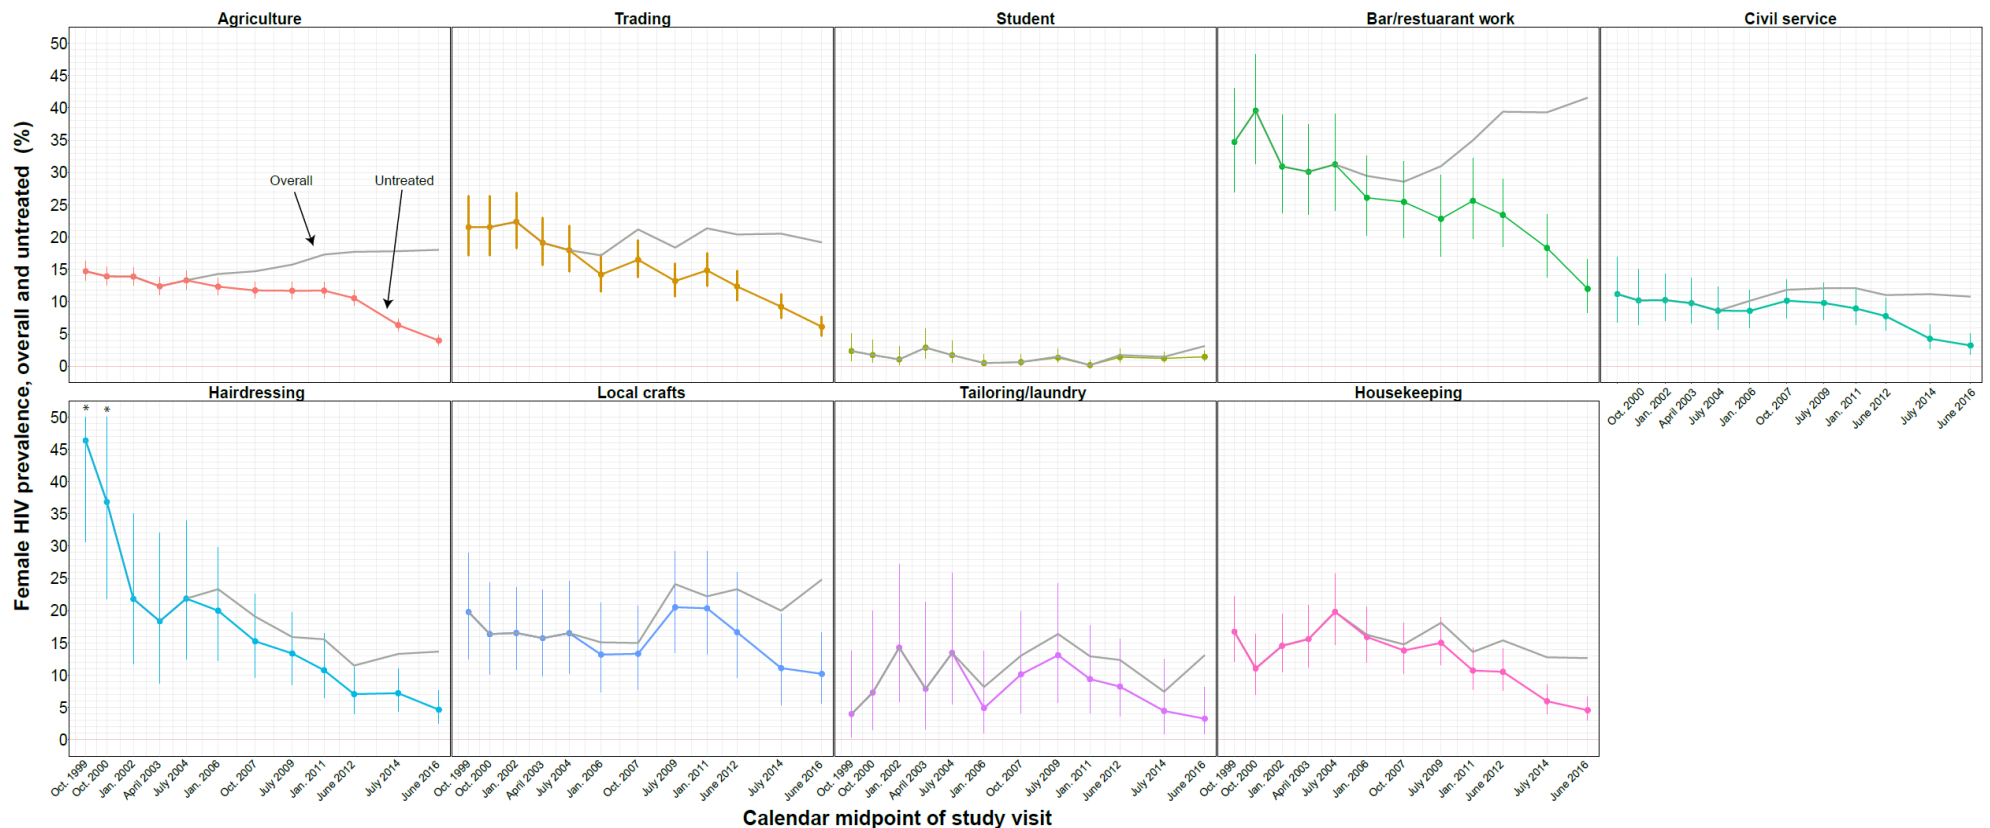

**Figure 2b.** Trends in HIV prevalence overall (treated and untreated) among women by primary occupational subgroup in the Rakai Community Cohort Study, 1999-2016; Untreated prevalence with 95% confidence intervals are shown in color; overall HIV prevalence is shown in gray. Data are plotted at the calendar midpoint of the study visit. \*Upper limit of 95%CI not shown.

**Supplemental Table 1a.** Self-reported primary occupations by male RCCS study participants at each study visit

| Occupations (n)              | Study visit (N reporting) |     |      |     |     |     |     |     |     |     |     |      |
|------------------------------|---------------------------|-----|------|-----|-----|-----|-----|-----|-----|-----|-----|------|
|                              | 1                         | 2   | 3    | 4   | 5   | 6   | 7   | 8   | 9   | 10  | 11  | 12   |
| Agriculture Home Use/Barter  | 817                       | 906 | 1028 | 740 | 758 | 880 | 791 | 768 | 922 | 861 | 761 | 760  |
| Agriculture Selling          | 157                       | 252 | 207  | 278 | 275 | 307 | 406 | 430 | 536 | 576 | 782 | 777  |
| Housework in Own Home        | 5                         | 4   | 6    | 6   | 9   | 2   | 11  | 12  | 7   | 11  | 17  | 23   |
| Housekeeper (for employer)   | 1                         | 3   | 3    | 3   | 4   | 4   | 0   | 0   | 2   | 1   | 4   | 0    |
| Home Brewing                 | 8                         | 12  | 6    | 4   | 6   | 5   | 6   | 10  | 6   | 8   | 6   | 6    |
| Government/Clerical/Teaching | 185                       | 214 | 271  | 268 | 285 | 284 | 295 | 287 | 308 | 352 | 351 | 381  |
| Fishing                      | 12                        | 12  | 19   | 16  | 16  | 21  | 7   | 12  | 17  | 6   | 11  | 19   |
| Student                      | 319                       | 351 | 388  | 343 | 333 | 432 | 543 | 582 | 726 | 851 | 988 | 1178 |
| Military/Police              | 29                        | 41  | 37   | 38  | 26  | 34  | 35  | 21  | 30  | 44  | 23  | 37   |
| Shopkeeper                   | 74                        | 85  | 93   | 86  | 114 | 73  | 94  | 96  | 106 | 113 | 118 | 130  |
| Trading/Vending              | 319                       | 348 | 319  | 317 | 348 | 416 | 478 | 504 | 513 | 602 | 574 | 620  |
| Bar Worker or Owner          | 8                         | 10  | 7    | 14  | 13  | 11  | 12  | 12  | 10  | 15  | 13  | 9    |
| Trucker                      | 28                        | 37  | 52   | 60  | 48  | 70  | 67  | 79  | 89  | 91  | 94  | 98   |
| Unemployed                   | 1                         | 2   | 0    | 1   | 6   | 0   | 0   | 0   | 0   | 0   | 1   | 1    |
| Other                        | 34                        | 34  | 31   | 25  | 32  | 22  | 24  | 10  | 17  | 22  | 162 | 26   |
| Healthcare Worker            | 4                         | 1   | 8    | 2   | 4   | 2   | 2   | 2   | 7   | 9   | 7   | 8    |
| Casual Labor                 | 65                        | 82  | 114  | 103 | 90  | 104 | 122 | 79  | 96  | 117 | 109 | 131  |
| Restaurant Worker or Cook    | 3                         | 1   | 3    | 10  | 10  | 10  | 11  | 14  | 11  | 19  | 16  | 23   |
| Hairdresser                  | 7                         | 12  | 23   | 24  | 29  | 33  | 34  | 41  | 43  | 52  | 57  | 68   |
| Construction                 | 184                       | 180 | 238  | 241 | 238 | 239 | 252 | 311 | 307 | 378 | 393 | 383  |
| Mechanic                     | 62                        | 60  | 85   | 70  | 64  | 97  | 119 | 158 | 191 | 233 | 247 | 302  |
| Boda Boda driver             | 14                        | 16  | 14   | 31  | 41  | 65  | 98  | 112 | 124 | 166 | 149 | 152  |
| Architect                    | 1                         | 1   | 0    | 1   | 0   | 1   | 1   | 1   | 0   | 0   | 0   | 0    |
| Baker                        | 11                        | 8   | 5    | 1   | 4   | 4   | 2   | 3   | 5   | 10  | 2   | 6    |
| Blacksmith or Welder         | 6                         | 5   | 7    | 4   | 4   | 6   | 8   | 10  | 11  | 29  | 26  | 37   |
| Butcher                      | 8                         | 15  | 23   | 26  | 23  | 21  | 36  | 33  | 23  | 32  | 28  | 33   |
| Carpenter                    | 82                        | 86  | 83   | 80  | 69  | 66  | 66  | 52  | 40  | 57  | 31  | 59   |

|                      |    |    |    |    |    |    |    |    |    |    |    |    |
|----------------------|----|----|----|----|----|----|----|----|----|----|----|----|
| Clergy               | 2  | 4  | 2  | 3  | 2  | 7  | 3  | 3  | 4  | 3  | 0  | 2  |
| Coffee Worker        | 1  | 1  | 2  | 3  | 1  | 2  | 0  | 1  | 0  | 1  | 0  | 1  |
| Conductor            | 2  | 2  | 4  | 0  | 0  | 0  | 0  | 1  | 0  | 0  | 0  | 1  |
| Driver               | 5  | 4  | 2  | 4  | 3  | 6  | 4  | 6  | 1  | 2  | 1  | 1  |
| Electrician          | 8  | 10 | 7  | 12 | 17 | 16 | 20 | 3  | 3  | 2  | 2  | 7  |
| Entertainer          | 1  | 1  | 1  | 2  | 2  | 4  | 4  | 4  | 6  | 2  | 4  | 3  |
| Local Crafts         | 20 | 13 | 21 | 24 | 18 | 16 | 22 | 26 | 22 | 25 | 10 | 23 |
| Lumberer             | 4  | 1  | 2  | 2  | 4  | 4  | 8  | 4  | 4  | 6  | 7  | 10 |
| Photographer         | 6  | 6  | 7  | 6  | 5  | 8  | 6  | 6  | 4  | 5  | 3  | 6  |
| Plumber              | 0  | 1  | 0  | 0  | 1  | 1  | 1  | 4  | 2  | 2  | 1  | 4  |
| Cobbler              | 1  | 3  | 3  | 0  | 0  | 1  | 2  | 1  | 6  | 7  | 2  | 2  |
| Social Worker        | 3  | 4  | 5  | 3  | 2  | 0  | 2  | 4  | 4  | 3  | 1  | 3  |
| Tailoring or Laundry | 18 | 16 | 19 | 10 | 16 | 18 | 17 | 18 | 17 | 31 | 19 | 25 |
| Traditional Healer   | 3  | 7  | 5  | 1  | 3  | 3  | 4  | 4  | 4  | 2  | 2  | 3  |



**Supplemental Table 1b.** Self-reported primary occupations by female RCCS study participants at each study visit

| Occupations (n)              | Study visit (N reporting) |      |      |      |      |      |      |      |      |      |      |      |
|------------------------------|---------------------------|------|------|------|------|------|------|------|------|------|------|------|
|                              | 1                         | 2    | 3    | 4    | 5    | 6    | 7    | 8    | 9    | 10   | 11   | 12   |
| Agriculture Home Use/Barter  | 1964                      | 2307 | 2316 | 2128 | 2222 | 2166 | 2202 | 1950 | 2196 | 2361 | 2215 | 2171 |
| Agriculture Selling          | 164                       | 172  | 204  | 182  | 168  | 326  | 327  | 347  | 417  | 396  | 468  | 495  |
| Housework in Own Home        | 200                       | 161  | 232  | 214  | 204  | 270  | 290  | 363  | 346  | 341  | 454  | 518  |
| Housekeeper (for employer)   | 27                        | 29   | 22   | 23   | 18   | 24   | 28   | 23   | 36   | 29   | 31   | 27   |
| Home Brewing                 | 15                        | 13   | 16   | 12   | 10   | 16   | 8    | 6    | 12   | 6    | 8    | 8    |
| Government/Clerical/Teaching | 141                       | 183  | 247  | 251  | 266  | 336  | 358  | 377  | 383  | 420  | 423  | 458  |
| Fishing                      | 1                         | 0    | 1    | 0    | 0    | 0    | 0    | 0    | 1    | 1    | 1    | 1    |
| Student                      | 254                       | 287  | 284  | 243  | 291  | 404  | 472  | 531  | 601  | 639  | 823  | 959  |
| Military/Police              | 5                         | 8    | 6    | 10   | 8    | 8    | 9    | 8    | 13   | 10   | 10   | 12   |
| Shopkeeper                   | 134                       | 146  | 182  | 230  | 227  | 328  | 326  | 365  | 376  | 417  | 426  | 470  |
| Trading/Vending              | 176                       | 166  | 191  | 229  | 236  | 262  | 327  | 364  | 380  | 435  | 521  | 570  |
| Bar Worker or Owner          | 108                       | 108  | 89   | 92   | 85   | 118  | 93   | 71   | 94   | 101  | 110  | 110  |
| Unemployed                   | 1                         | 3    | 2    | 1    | 0    | 1    | 0    | 1    | 0    | 0    | 0    | 1    |
| Other                        | 18                        | 23   | 20   | 16   | 5    | 7    | 12   | 8    | 9    | 7    | 129  | 10   |
| Healthcare Worker            | 23                        | 23   | 40   | 36   | 39   | 40   | 43   | 53   | 49   | 58   | 59   | 58   |
| Casual Labor                 | 10                        | 20   | 20   | 27   | 23   | 25   | 39   | 36   | 28   | 25   | 30   | 46   |
| Restaurant Worker or Cook    | 36                        | 31   | 63   | 84   | 75   | 89   | 131  | 113  | 109  | 168  | 152  | 157  |
| Hairdresser                  | 41                        | 38   | 55   | 49   | 64   | 90   | 131  | 157  | 167  | 226  | 263  | 300  |
| Construction                 | 0                         | 0    | 0    | 0    | 0    | 0    | 0    | 2    | 1    | 0    | 0    | 1    |
| Mechanic                     | 0                         | 0    | 0    | 0    | 0    | 0    | 0    | 0    | 1    | 1    | 1    | 1    |
| Baker                        | 1                         | 0    | 1    | 0    | 0    | 1    | 0    | 1    | 0    | 1    | 1    | 3    |
| Blacksmith or Welder         | 0                         | 0    | 0    | 0    | 0    | 0    | 0    | 0    | 0    | 1    | 0    | 0    |
| Carpenter                    | 0                         | 0    | 0    | 0    | 0    | 0    | 1    | 0    | 0    | 1    | 0    | 0    |
| Clergy                       | 1                         | 1    | 1    | 0    | 1    | 1    | 1    | 0    | 1    | 1    | 1    | 0    |
| Coffee Worker                | 0                         | 0    | 0    | 0    | 0    | 0    | 0    | 4    | 1    | 4    | 1    | 3    |
| Entertainer                  | 0                         | 0    | 0    | 0    | 0    | 0    | 0    | 0    | 0    | 0    | 1    | 0    |
| Local Crafts                 | 101                       | 116  | 145  | 127  | 115  | 106  | 120  | 112  | 108  | 90   | 90   | 137  |

|                      |    |    |    |    |    |    |    |    |    |    |    |     |
|----------------------|----|----|----|----|----|----|----|----|----|----|----|-----|
| Cobbler              | 0  | 1  | 0  | 0  | 0  | 0  | 0  | 0  | 0  | 0  | 1  | 1   |
| Social Worker        | 1  | 2  | 0  | 0  | 1  | 1  | 4  | 1  | 2  | 2  | 1  | 1   |
| Tailoring or Laundry | 50 | 41 | 49 | 38 | 52 | 61 | 69 | 61 | 85 | 97 | 67 | 122 |
| Traditional Healer   | 2  | 1  | 1  | 1  | 1  | 1  | 1  | 5  | 2  | 4  | 2  | 7   |

**Supplemental Table 2.** Recategorization of 41 self-reported primary occupations into occupational sub-groups

| <b>Final Subgroup</b>   | <b>Original Category</b>     |
|-------------------------|------------------------------|
| Agriculture             | Agriculture home use/barter  |
|                         | Agriculture selling          |
|                         | Coffee worker                |
| Bar/restaurant work     | Bar worker or owner          |
|                         | Restaurant worker or cook    |
|                         | Baker                        |
| Butcher                 | Butcher                      |
| Casual labor/unemployed | Home Brewing                 |
|                         | Unemployed                   |
|                         | Casual Labor                 |
|                         | Blacksmith or welder         |
|                         | Carpenter                    |
| Construction            | Construction                 |
| Civil service           | Government/clerical/teaching |
|                         | Military/police              |
|                         | Healthcare worker            |
|                         | Social worker                |
| Hairdressing            | Hairdresser                  |
| Housekeeping            | Housework in own home        |
|                         | Housekeeper (for employer)   |
| Local crafts            | Local crafts                 |
| Mechanic                | Mechanic                     |
| Other                   | Clergy                       |
|                         | Fishing                      |
|                         | Entertainer                  |
|                         | Cobbler                      |
|                         | Traditional healer           |
| Student                 | Other                        |

|                   |                      |
|-------------------|----------------------|
| Tailoring/laundry | Student              |
| Trading           | Tailoring or laundry |
|                   | Shopkeeper           |
| Transportation    | Trader               |
|                   | Trucker              |
|                   | Boda Boda            |
|                   | Bus conductor        |
|                   | Driver               |

**Supplemental Table 3a.** Number of male observations at each study visit by primary occupational subgroup

| Occupational subgroup              | Study Visit<br>N = 44,286 <sup>a</sup> |      |      |      |      |      |      |      |      |      |      |      | Median number of observations across all visits |
|------------------------------------|----------------------------------------|------|------|------|------|------|------|------|------|------|------|------|-------------------------------------------------|
|                                    | 1                                      | 2    | 3    | 4    | 5    | 6    | 7    | 8    | 9    | 10   | 11   | 12   |                                                 |
| Agriculture                        | 975                                    | 1159 | 1237 | 1021 | 1034 | 1189 | 1197 | 1199 | 1458 | 1438 | 1543 | 1538 | 1198.5                                          |
| Bar/restaurant worker <sup>b</sup> | 11                                     | 11   | 10   | 24   | 23   | 21   | 23   | 26   | 21   | 34   | 29   | 32   | 23                                              |
| Butcher <sup>b</sup>               | 8                                      | 15   | 23   | 26   | 23   | 21   | 36   | 33   | 23   | 32   | 28   | 33   | 24.5                                            |
| Casual labor                       | 66                                     | 84   | 114  | 104  | 96   | 104  | 122  | 79   | 96   | 117  | 110  | 132  | 104                                             |
| Civil service                      | 221                                    | 260  | 321  | 311  | 317  | 320  | 334  | 314  | 349  | 408  | 382  | 429  | 320.5                                           |
| Construction                       | 285                                    | 284  | 337  | 340  | 333  | 333  | 356  | 385  | 367  | 474  | 460  | 500  | 348                                             |
| Hairdressing <sup>b</sup>          | 7                                      | 12   | 23   | 24   | 29   | 33   | 34   | 41   | 43   | 52   | 57   | 68   | 33.5                                            |
| Housekeeping <sup>b</sup>          | 6                                      | 7    | 9    | 9    | 13   | 6    | 11   | 12   | 9    | 12   | 21   | 23   | 10                                              |
| Local crafts <sup>b</sup>          | 20                                     | 13   | 21   | 24   | 18   | 16   | 22   | 26   | 22   | 25   | 10   | 23   | 21.5                                            |
| Mechanic                           | 62                                     | 60   | 85   | 70   | 64   | 97   | 119  | 158  | 191  | 233  | 247  | 302  | 108                                             |
| Student                            | 319                                    | 351  | 388  | 343  | 333  | 432  | 543  | 582  | 726  | 851  | 988  | 1178 | 488                                             |
| Tailoring/laundry <sup>b</sup>     | 18                                     | 16   | 19   | 10   | 16   | 18   | 17   | 18   | 17   | 31   | 19   | 25   | 18                                              |
| Trading                            | 401                                    | 445  | 418  | 407  | 468  | 494  | 578  | 610  | 625  | 723  | 698  | 756  | 536.5                                           |
| Transportation                     | 49                                     | 59   | 72   | 95   | 92   | 141  | 169  | 198  | 214  | 259  | 244  | 252  | 155                                             |
| Other <sup>c</sup>                 | 70                                     | 75   | 73   | 54   | 64   | 70   | 52   | 43   | 63   | 57   | 186  | 67   | 65.5                                            |
| Total                              | 2518                                   | 2851 | 3150 | 2862 | 2923 | 3295 | 3613 | 3724 | 4224 | 4746 | 5022 | 5358 | 3454                                            |

<sup>a</sup>14,753 unique individuals

<sup>b</sup>Occupations were dropped from final analysis if median number of observations across all study visits < 50

<sup>c</sup>Category is a composite of multiple small categories that do not fit in any of the main categories and was dropped from main analysis

n – Number of observations by visit in each occupational category

N – Total number of observations during study period

**Supplemental Table 3b.** Number of female observations in each primary occupational subgroup at each study visit

| Occupational subgroup     | Study Visit<br>N = 58,473 <sup>a</sup> |             |             |             |             |             |             |             |             |             |             |             | Median number of observations across all visits |
|---------------------------|----------------------------------------|-------------|-------------|-------------|-------------|-------------|-------------|-------------|-------------|-------------|-------------|-------------|-------------------------------------------------|
|                           | 1                                      | 2           | 3           | 4           | 5           | 6           | 7           | 8           | 9           | 10          | 11          | 12          |                                                 |
| Agriculture               | 2128                                   | 2479        | 2520        | 2310        | 2390        | 2492        | 2529        | 2301        | 2614        | 2761        | 2684        | 2669        | 2506                                            |
| Bar/restaurant worker     | 144                                    | 139         | 152         | 176         | 160         | 207         | 224         | 184         | 203         | 269         | 262         | 267         | 193.5                                           |
| Butcher <sup>b</sup>      | 0                                      | 0           | 0           | 0           | 0           | 0           | 0           | 0           | 0           | 0           | 0           | 0           | 0                                               |
| Casual Labor <sup>b</sup> | 11                                     | 23          | 22          | 28          | 23          | 26          | 39          | 37          | 28          | 25          | 30          | 47          | 27                                              |
| Civil service             | 170                                    | 216         | 293         | 297         | 314         | 385         | 414         | 439         | 447         | 490         | 493         | 529         | 399.5                                           |
| Construction <sup>b</sup> | 0                                      | 0           | 0           | 0           | 0           | 0           | 1           | 2           | 1           | 2           | 0           | 1           | 1                                               |
| Hairdressing              | 41                                     | 38          | 55          | 49          | 64          | 90          | 131         | 157         | 167         | 226         | 263         | 300         | 110.5                                           |
| Housekeeping              | 227                                    | 190         | 254         | 237         | 222         | 294         | 318         | 386         | 382         | 370         | 485         | 545         | 306.5                                           |
| Local Crafts              | 101                                    | 116         | 145         | 127         | 115         | 106         | 120         | 112         | 108         | 90          | 90          | 137         | 113.5                                           |
| Mechanic <sup>b</sup>     | 0                                      | 0           | 0           | 0           | 0           | 0           | 0           | 0           | 1           | 1           | 1           | 1           | 1                                               |
| Student                   | 254                                    | 287         | 284         | 243         | 291         | 404         | 472         | 531         | 601         | 639         | 823         | 959         | 438.5                                           |
| Tailoring/Laundry         | 50                                     | 41          | 49          | 38          | 52          | 61          | 69          | 61          | 85          | 97          | 67          | 122         | 61                                              |
| Trading                   | 325                                    | 325         | 389         | 471         | 473         | 606         | 661         | 735         | 768         | 858         | 955         | 1048        | 633.5                                           |
| Transportation            | 0                                      | 0           | 0           | 0           | 0           | 0           | 0           | 0           | 0           | 0           | 0           | 0           | 0                                               |
| Other <sup>b</sup>        | 23                                     | 26          | 24          | 17          | 7           | 10          | 14          | 14          | 13          | 14          | 136         | 22          | 15.5                                            |
| <b>Total</b>              | <b>3474</b>                            | <b>3880</b> | <b>4187</b> | <b>3993</b> | <b>4111</b> | <b>4681</b> | <b>4992</b> | <b>4959</b> | <b>5418</b> | <b>5842</b> | <b>6289</b> | <b>6647</b> | <b>4820</b>                                     |

<sup>a</sup>19,113 unique individuals

<sup>b</sup>Occupations were dropped from final analysis if median number of observations across all study visits < 50

n – Number of observations by visit in each occupational category

N – Total number of observations during study period

**Supplemental Figure 1.** Boxplots of age in years at each study visit, among RCCS agricultural workers. The bottom and top of the boxes represent the 25th and 75th percentiles of the data (interquartile range), respectively. The solid black line in the middle of the box represents the median (50th percentile) and the lines represent values beyond the middle 50% of the data.

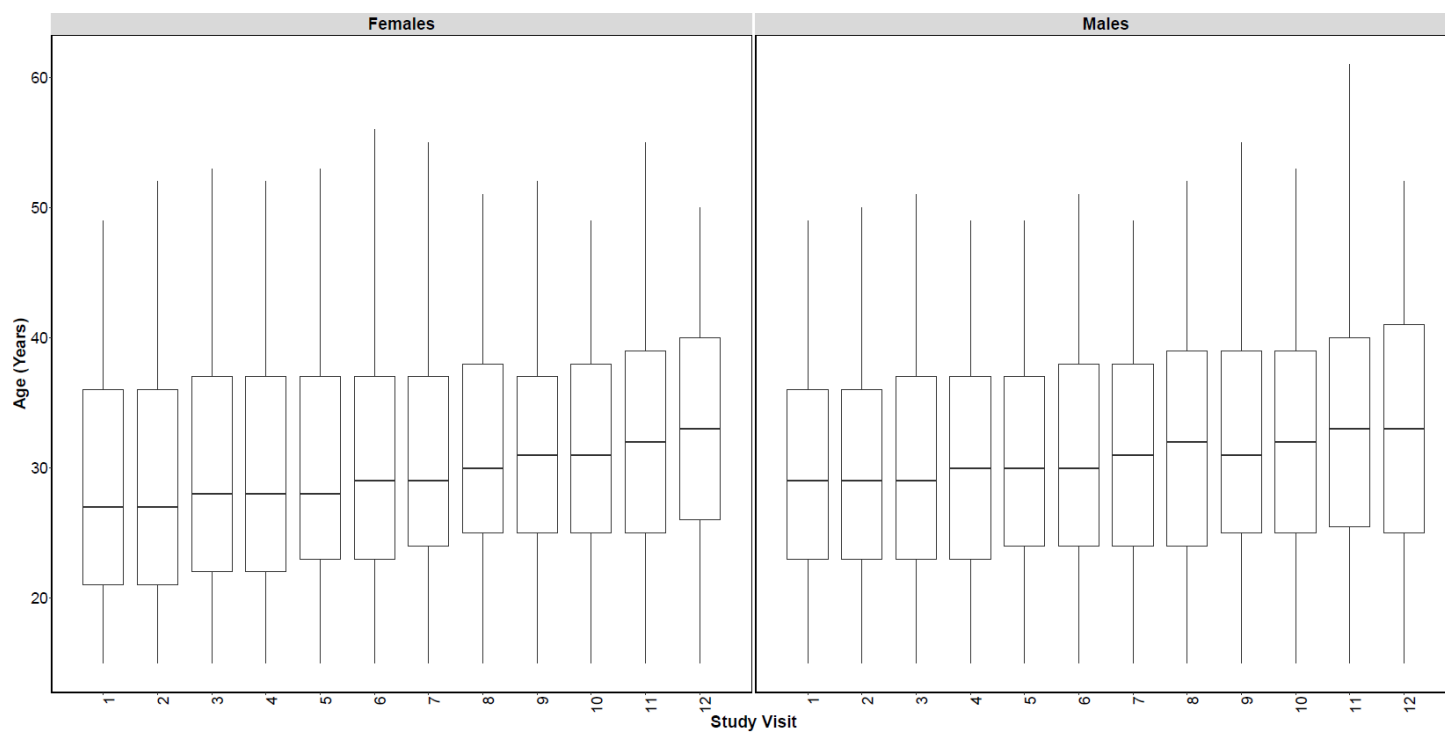

Source: https://medrxiv.org/content/10.1101/2022.06.21.22276714v1.full.pdf
